# Supplementary material for: Solvent/metal-free benzimidazolium-based carboxyl-functionalized porphyrin photocatalysts for the room-temperature alkylation of amines under the irradiation of visible light
Source: Royal Society of Chemistry journal article supplement (doi:10.1039/d2cy00846g), 2022-01-01
Supplement: d2cy00846g1.pdf [file d2cy00846g1.pdf]

# Solvent/Metal-Free Benzimidazolium-Based Carboxyl Functionalized Porphyrin Photocatalyst for Room-Temperature Alkylation of Amines under Irradiation of Visible Light

Subodh Uttamrao Raut<sup>a</sup>, Kamlesh Rudreshwar Balinge<sup>b</sup>, Shubham Avinash Deshmukh<sup>a</sup>,  
Shital Haribhau Barange<sup>a</sup>, Bhairav Chandroday Mataghare<sup>a</sup> and Pundlik Ramhau Bhagat<sup>a\*</sup>

*(E-mail: \*drprbhagat111@gmail.com)*

a. Department of Chemistry, School of Advanced Sciences, Vellore Institute of Technology,  
Vellore 632014, India

b. Department of Chemistry, Saveetha School of Engineering, Saveetha Institute of Medical  
and Technical Science, Saveetha University, Chennai, Tamil Nadu 602105, India

| Sr. No. | Contents                                                                                                                                                                                 | Pg. No. |
|---------|------------------------------------------------------------------------------------------------------------------------------------------------------------------------------------------|---------|
| 1       | Fig.S1. $^1\text{H}$ NMR Spectrum of compound 4B<br>Fig.S2. $^{13}\text{C}$ NMR Spectrum of compound 4B                                                                                  | 4       |
| 2       | Fig.S3 FT-IR Spectrum of compound 4B<br>Fig.S4 GCMS Spectrum of compound 4B                                                                                                              | 5       |
| 3       | Fig.S5 $^1\text{H}$ NMR Spectrum of compound 4C<br>Fig.S6 $^{13}\text{C}$ NMR Spectrum of compound 4C                                                                                    | 6       |
| 4       | Fig.S7. FT-IR Spectrum of Compound 4C<br>Fig.S8 GCMS Spectrum of compound 4C                                                                                                             | 7       |
| 5       | Fig.S9 $^1\text{H}$ NMR Spectrum of Compound 4D<br>Fig.S10 $^{13}\text{C}$ NMR Spectrum of compound 4D                                                                                   | 8       |
| 6       | Fig.S11. $^1\text{H}$ NMR spectrum of compound 4E<br>Fig.S12. $^{13}\text{C}$ NMR spectrum of compound 4E                                                                                | 9       |
| 7       | Fig.S13. FT-IR spectrum of compound 4E<br>Fig.S14. $^1\text{H}$ NMR spectrum of compound 4F                                                                                              | 10      |
| 8       | Fig.S15. FT-IR spectrum of compound 4F<br>Fig.S16. $^1\text{H}$ NMR spectrum of compound 4F                                                                                              | 11      |
| 9       | Fig.S17. $^1\text{H}$ NMR spectrum of Photocatalyst (MFBBFCFPc)<br>Fig.S18. FT-IR spectrum of Photocatalyst (MFBBFCFPc)                                                                  | 12      |
| 10      | Fig.S19 $^1\text{H}$ NMR spectrum of N-ethyl aniline (D1)<br>Fig.S20 GCMS spectrum of N-ethyl aniline (D1)                                                                               | 13      |
| 11      | Fig.S21. $^1\text{H}$ NMR spectrum of N-ethyl-4-nitroaniline (D2)<br>Fig.S22 $^1\text{H}$ NMR spectrum of $\text{N}^1, \text{N}^4$ -dimethylbenzene-1, 4-diamine (D3)                    | 14      |
| 12      | Fig.S23 GCMS spectrum of $\text{N}^1, \text{N}^4$ -dimethylbenzene-1, 4-diamine (D3)<br>Fig.S24 $^1\text{H}$ NMR spectrum of $\text{N}^1, \text{N}^4$ -diethylbenzene-1,4-diamine (D4)   | 15      |
| 13      | Fig.S25 $^1\text{H}$ NMR spectrum of $\text{N}^1, \text{N}^4$ -dipropylbenzene-1, 4-diamine (D5)<br>Fig.S26 GCMS spectrum of $\text{N}^1, \text{N}^4$ -dipropylbenzene-1, 4-diamine (D5) | 16      |
| 14      | Fig.S27 $^1\text{H}$ NMR spectrum of 4-chloro-N, N-dimethyl aniline (D6)<br>Fig. S28 $^{13}\text{C}$ NMR spectrum of 4-chloro-N, N-dimethyl aniline (D6)                                 | 17      |
| 15      | Fig. S29 GCMS spectrum of 4-chloro-N, N-dimethyl aniline (D6)<br>Fig. S30 $^1\text{H}$ NMR spectrum of 4-chloro-N,N-diethylaniline (D7)                                                  | 18      |
| 16      | Fig. S31 $^{13}\text{C}$ NMR spectrum of 4-chloro-N,N-diethylaniline (D7)<br>Fig. S32 GCMS spectrum of 4-chloro-N,N-diethylaniline (D7)                                                  | 19      |
| 17      | Fig. S33 $^1\text{H}$ NMR spectrum of 4-chloro-N,N-dipropylaniline (D8)<br>Fig. S34 $^{13}\text{C}$ NMR spectrum of 4-chloro-N,N-dipropylaniline (D8)                                    | 20      |
|         |                                                                                                                                                                                          |         |

|    |                                                                                                                                                                                                                                     |    |
|----|-------------------------------------------------------------------------------------------------------------------------------------------------------------------------------------------------------------------------------------|----|
| 18 | Fig. S35 <sup>1</sup> H NMR spectrum of 4-chloro-N, N-dibutylaniline (D9)<br>Fig. S36 <sup>1</sup> H NMR spectrum of 4-bromo-N,N-dimethylaniline (D10)                                                                              | 21 |
| 19 | Fig. S37 <sup>1</sup> H NMR spectrum of 4-bromo-N,N-diethylaniline (D11)<br>Fig. S38 GCMS spectrum of 4-bromo-N,N-diethylaniline (D11)                                                                                              | 22 |
| 20 | Fig. S39 <sup>1</sup> H NMR 4-bromo-N, N-dipropylaniline (D12)<br>Fig. S40 <sup>1</sup> H NMR spectrum of 4-bromo-N, N-dibutylaniline (D13)                                                                                         | 23 |
| 21 | Fig. S41 <sup>1</sup> H NMR spectrum of 4-bromo-N, N-dipentylaniline (D14)<br>Fig. S42 <sup>1</sup> H NMR spectrum of 1-methyl-1H-pyrrole (D15)                                                                                     | 24 |
| 22 | Fig. S43 GCMS spectrum of 1-methyl-1H-pyrrole (D15)<br>Fig. S44 <sup>1</sup> H NMR spectrum of 1-ethyl-1H-pyrrole (D16)                                                                                                             | 25 |
| 23 | Fig. S45 GCMS spectrum of 1-ethyl-1H-pyrrole (D16)<br>Fig. S46 <sup>1</sup> H NMR spectrum of 1-propyl-1H-pyrrole (D17)                                                                                                             | 26 |
| 24 | Fig. S47 GCMS spectrum of 1-propyl-1H-pyrrole (D17)<br>Fig. S48 <sup>1</sup> H NMR spectrum of 1-Butyl 1-1H-pyrrole (D18)                                                                                                           | 27 |
| 25 | Fig. S49 GCMS spectrum of 1-Butyl 1-1H-pyrrole (D18)<br>Fig.S50 <sup>1</sup> H NMR spectrum of 1-pentyl-1H-pyrrole (D19)                                                                                                            | 28 |
| 26 | Fig.S51 <sup>1</sup> H NMR spectrum of 1-hexyl-1H-pyrrole (D20)<br>Fig.S52 <sup>13</sup> C NMR spectrum of 1-hexyl-1H-pyrrole (D20)                                                                                                 | 29 |
| 27 | Fig.S53 <sup>13</sup> C GCMS spectrum of 1-hexyl-1H-pyrrole (D20)<br>Fig.S54 <sup>1</sup> H NMR spectrum of 4-methylmorpholine (D21)                                                                                                | 30 |
|    | Fig.S55 <sup>1</sup> H NMR spectrum of 4-Ethyl morpholine (D22)<br>Fig.S56 <sup>1</sup> H NMR spectrum of 4-propylmorpholine (D23)                                                                                                  | 31 |
| 28 | Fig.S57 <sup>13</sup> C NMR spectrum of 4-propylmorpholine (D23)<br>Fig. S58 <sup>1</sup> H NMR spectrum of 4-butylmorpholine (D24)                                                                                                 | 32 |
| 29 | Fig. S59 <sup>1</sup> H NMR spectrum of 4-pentylmorpholine (D25)<br>Fig. S60 <sup>13</sup> C NMR spectrum of 4-pentylmorpholine (D25)                                                                                               | 33 |
| 30 | Fig. S61 <sup>1</sup> H NMR spectrum of 4-hexylmorpholine (D26)<br>Fig. S62 <sup>13</sup> C NMR spectrum of 4-hexylmorpholine (D26)                                                                                                 | 34 |
| 31 | Fig. S63 <sup>1</sup> H NMR spectrum of 4-octylmorpholine (D27)<br>Fig. S64 <sup>13</sup> C NMR spectrum of 4-octylmorpholine (D27)                                                                                                 | 35 |
| 32 | Fig. S65 <sup>1</sup> H NMR spectrum of N <sup>1</sup> , N <sup>4</sup> -dibenzylbenzene-1,4-diamine (D28)<br>Fig. S66 <sup>1</sup> H NMR spectrum of N <sup>1</sup> ,N <sup>4</sup> -bis(furan-2-ylmethyl)benzene-1,4-diamine(D29) | 36 |
| 33 | Fig. S67 <sup>1</sup> H NMR spectrum of N-benzylaniline (D30)<br>Fig. S68 <sup>1</sup> H NMR spectrum of N-(furan-2-ylmethyl) aniline (D31)                                                                                         | 37 |
| 34 | Fig. S69 GCMS spectrum of N-(furan-2-ylmethyl) aniline (D31)<br>Fig. S70 Leaching test of photocatalyst under optimized conditions                                                                                                  | 38 |
| 35 | Fig. S71 Home-made Photocatalytic Reactor<br>Fig. S72. Atomic absorption spectroscopy of Zn                                                                                                                                         | 39 |
| 36 | Table S1. Comparison of binding energies of different metals in XPS<br>Table S2. Elemental ID and Quantification obtained from XPS data                                                                                             | 40 |
| 37 | Table S3. Atomic absorption spectroscopy of Zn<br>Table S4. ICP-OES of CN-35 and MFBCFCPC                                                                                                                                           | 41 |

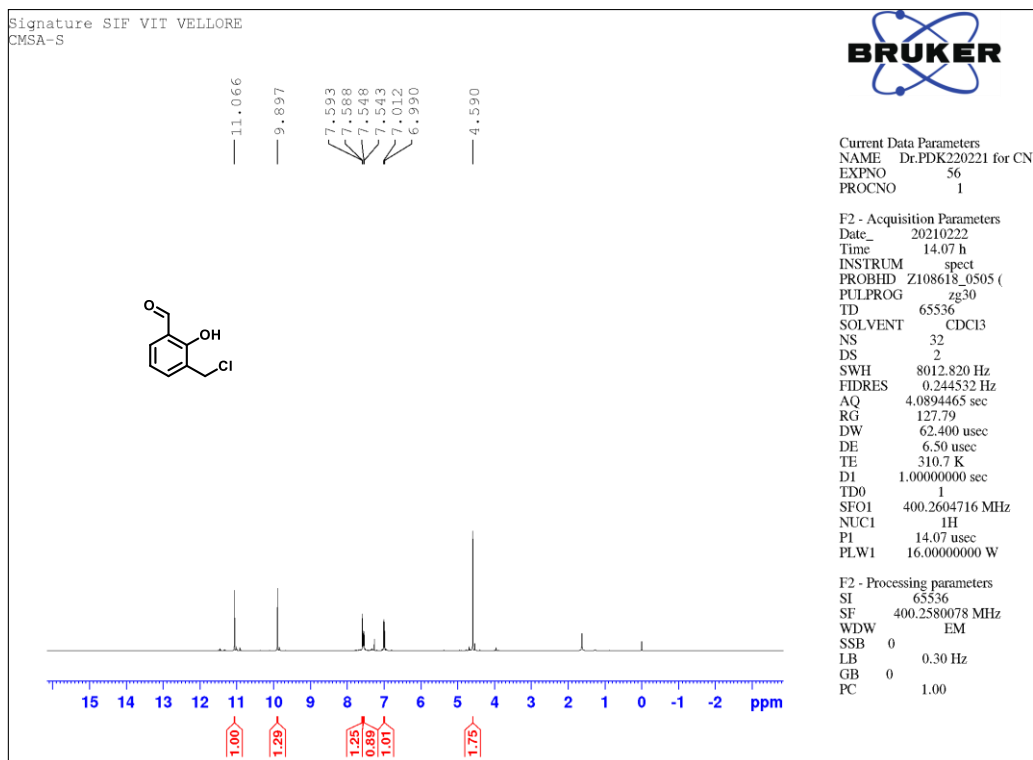

Fig.S1.  $^1\text{H}$  NMR Spectrum of compound 4B

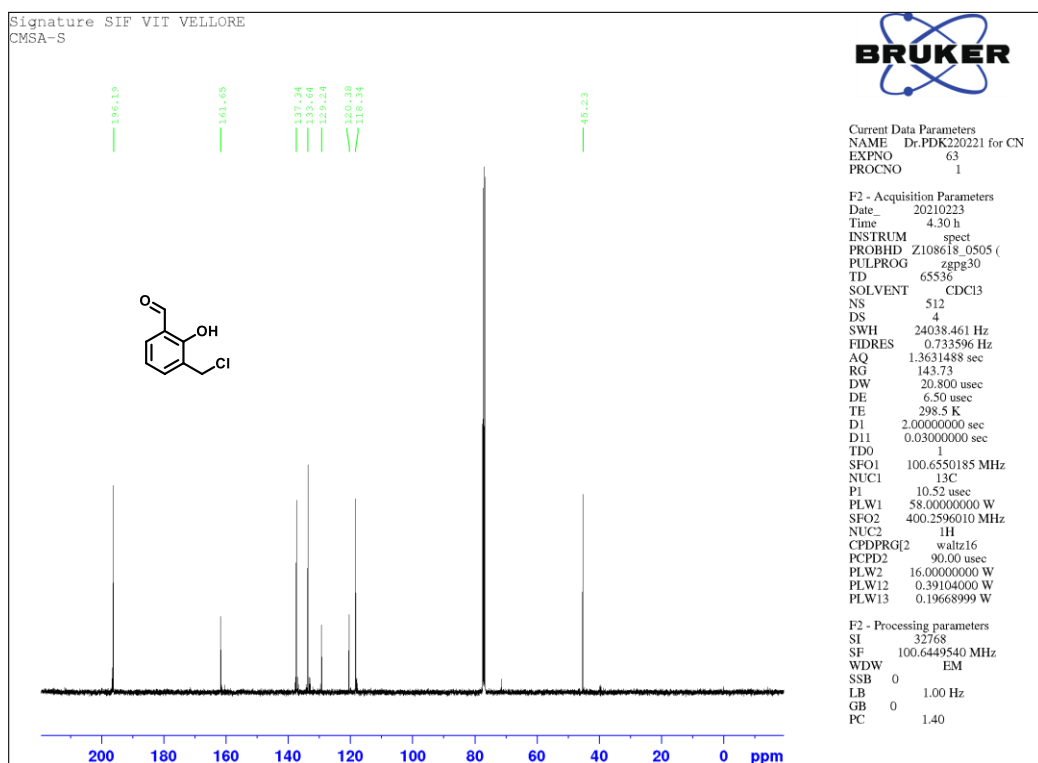

Fig.S2.  $^{13}\text{C}$  NMR Spectrum of compound 4B

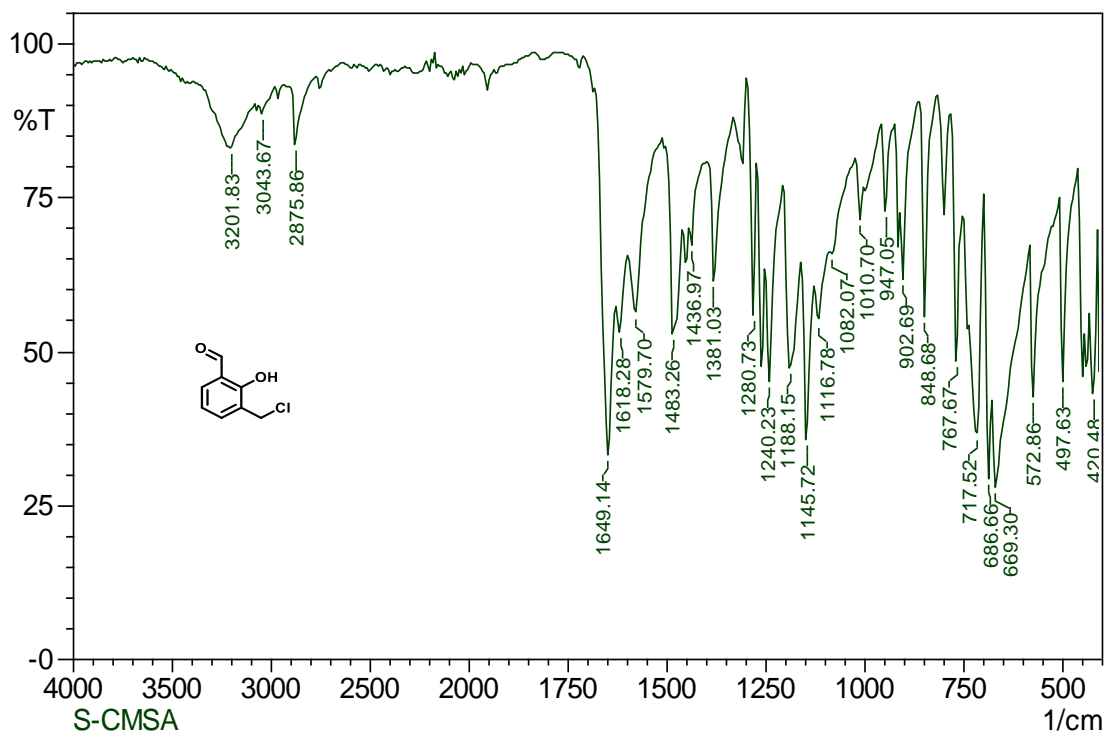

Fig.S3 FT-IR Spectrum of compound 4B

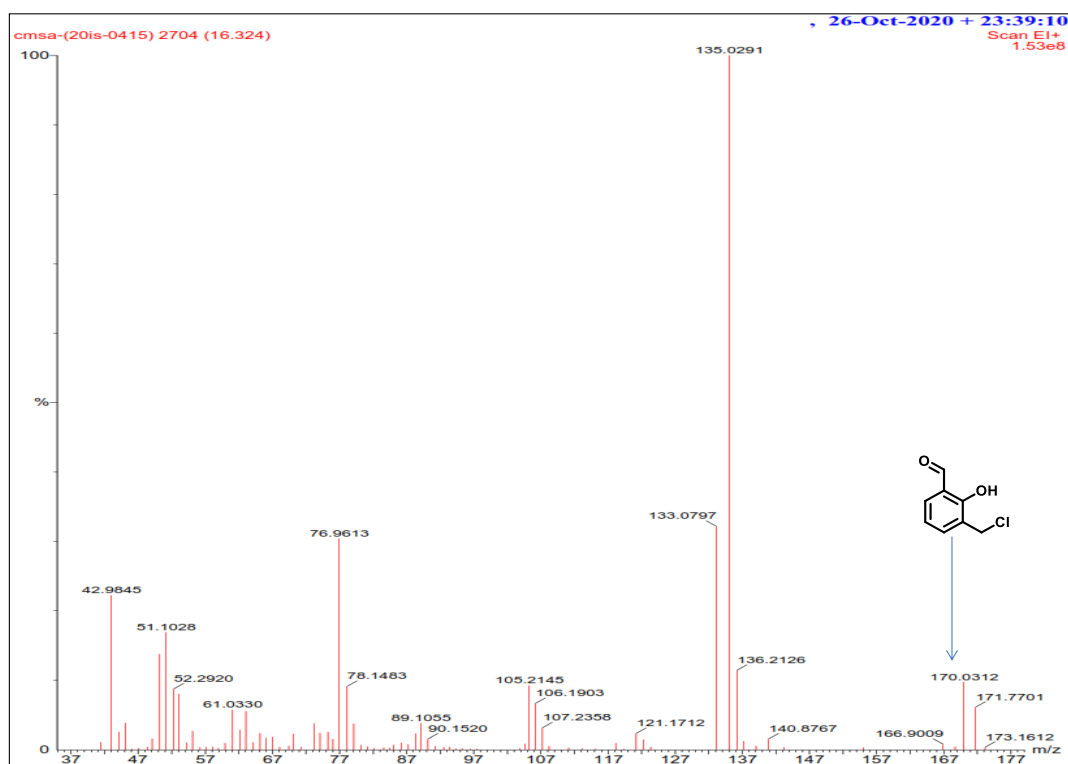

Fig.S4 GCMS Spectrum of compound 4B

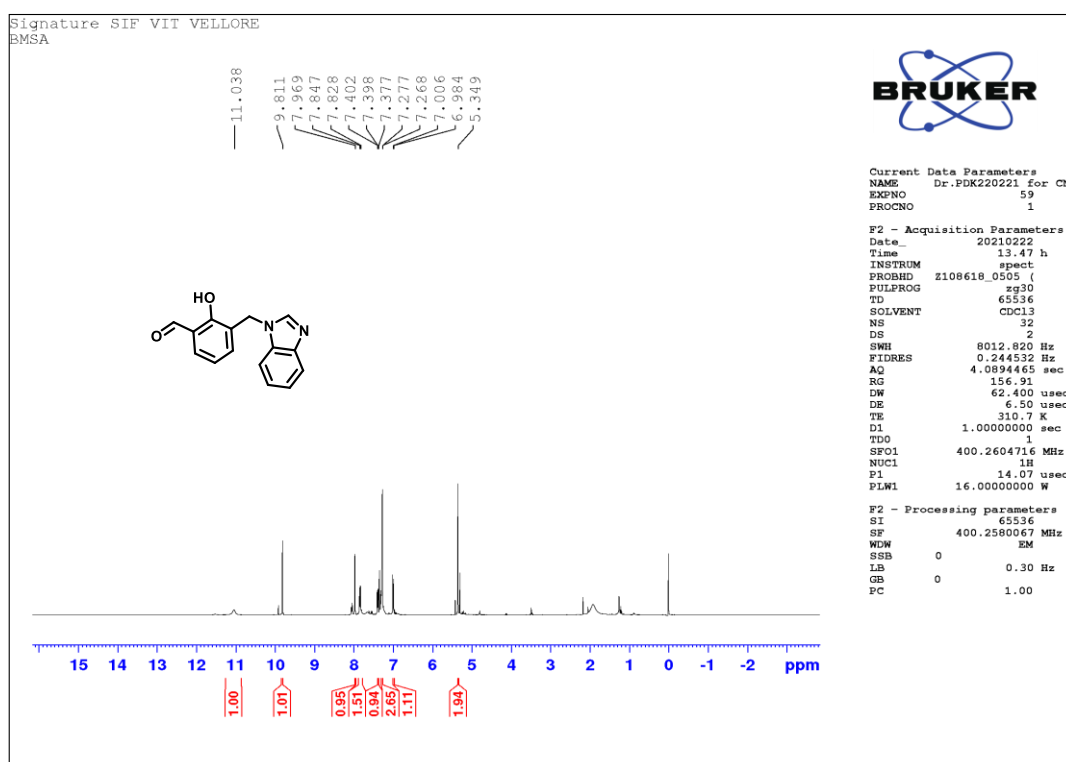

Fig.S5  $^1\text{H}$  NMR Spectrum of compound 4C

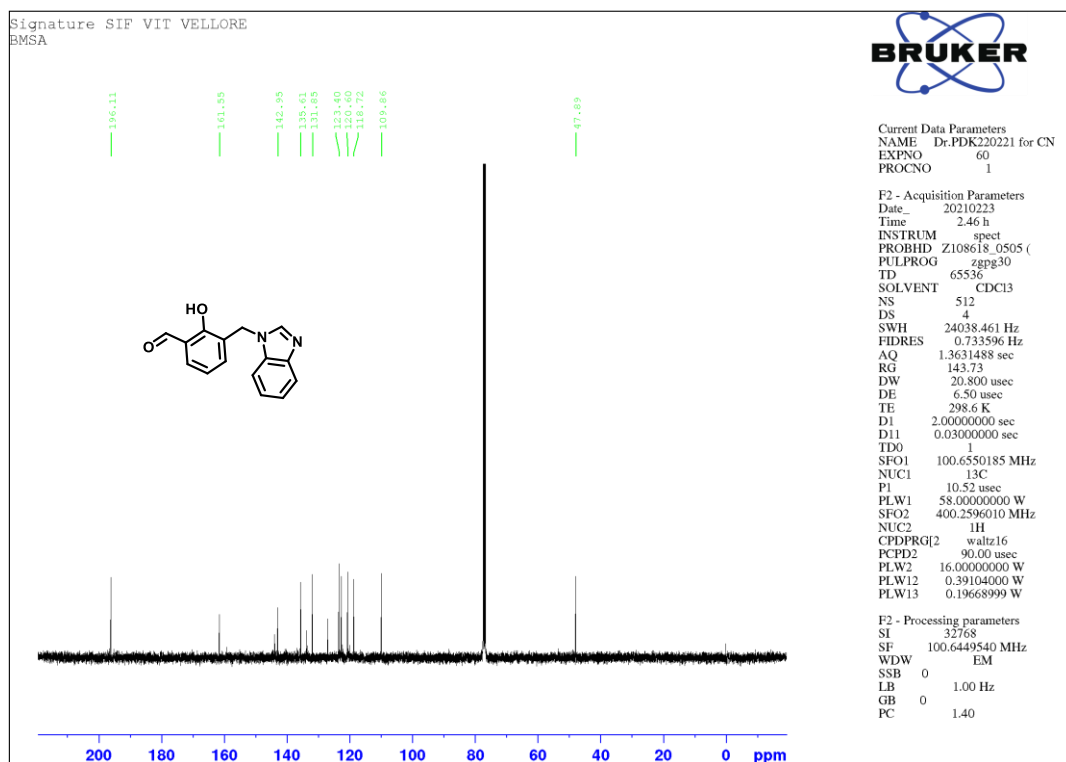

Fig. S6  $^{13}\text{C}$  NMR Spectrum of compound 4C

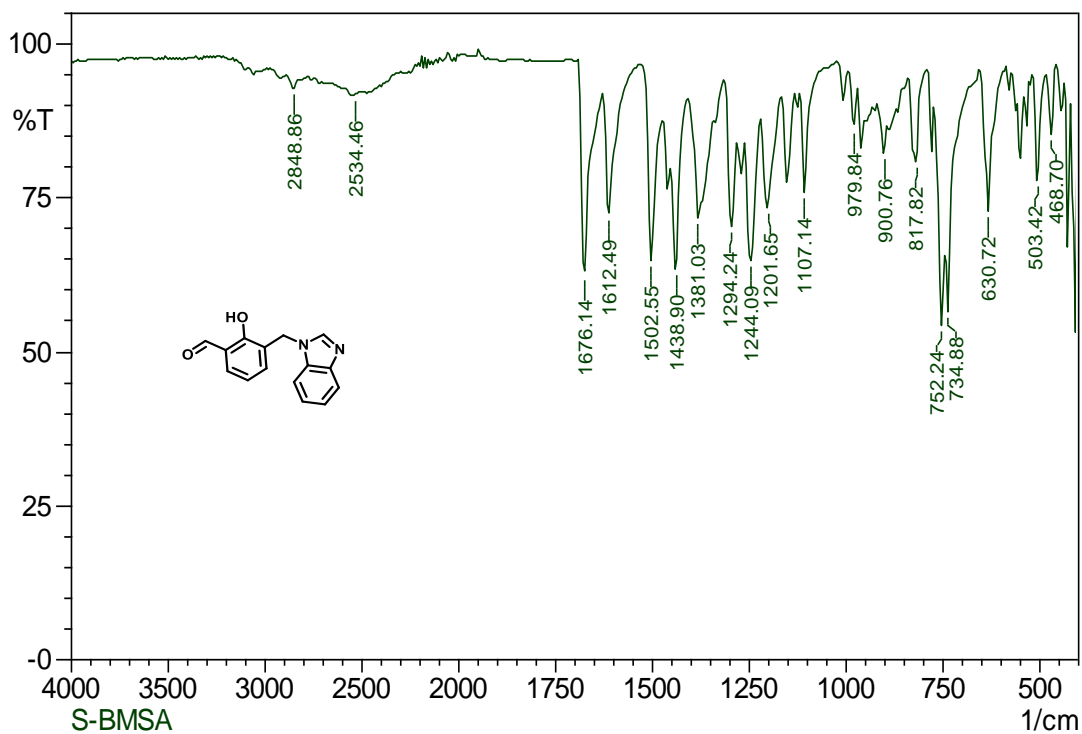

Fig.S7. FT-IR Spectrum of Compound 4C

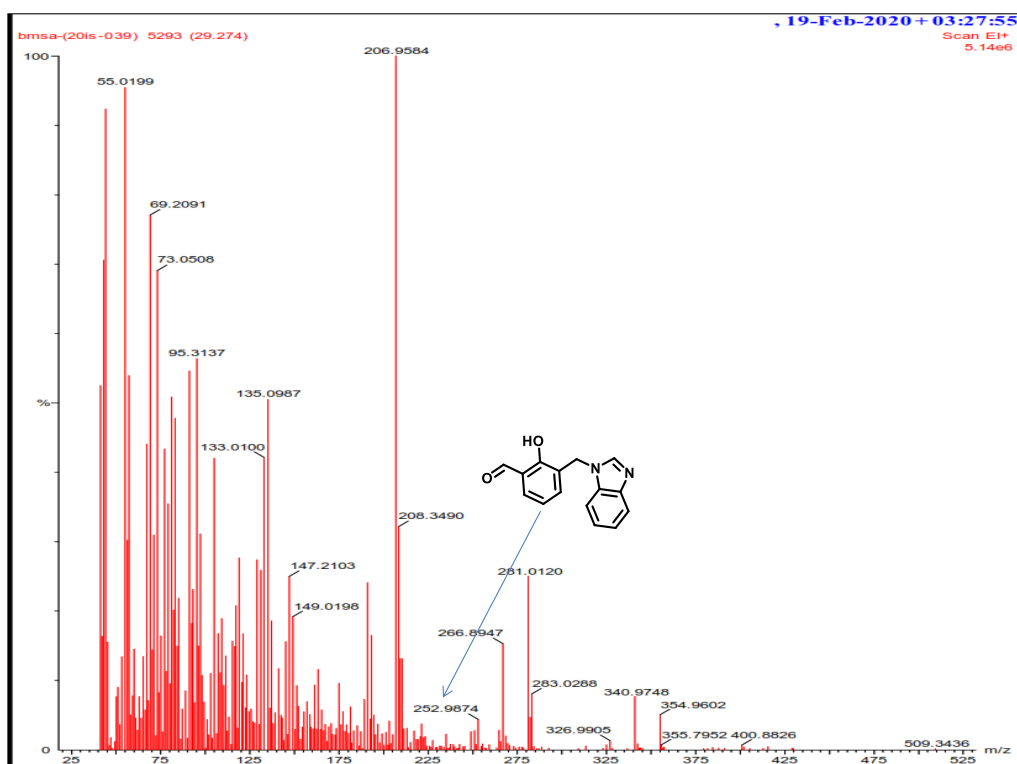

Fig.S8 GCMS Spectrum of compound 4C

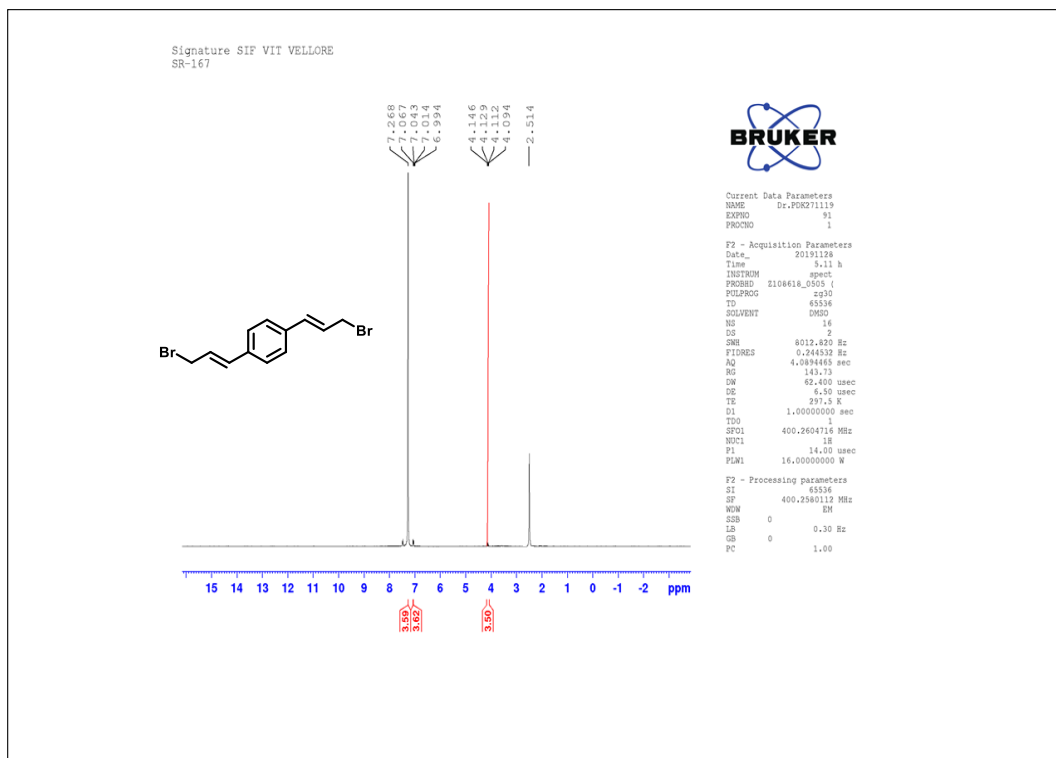

Fig.S9  $^1\text{H}$  NMR Spectrum of Compound 4D

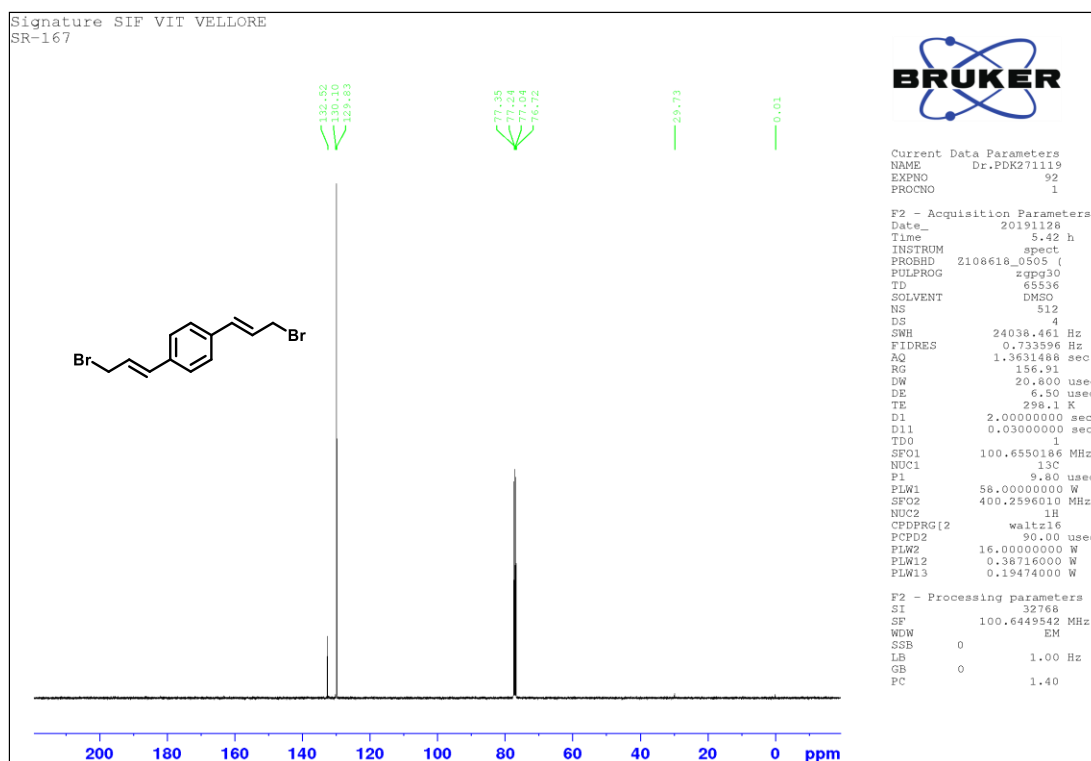

Fig.S10  $^{13}\text{C}$  CNMR Spectrum of compound 4D



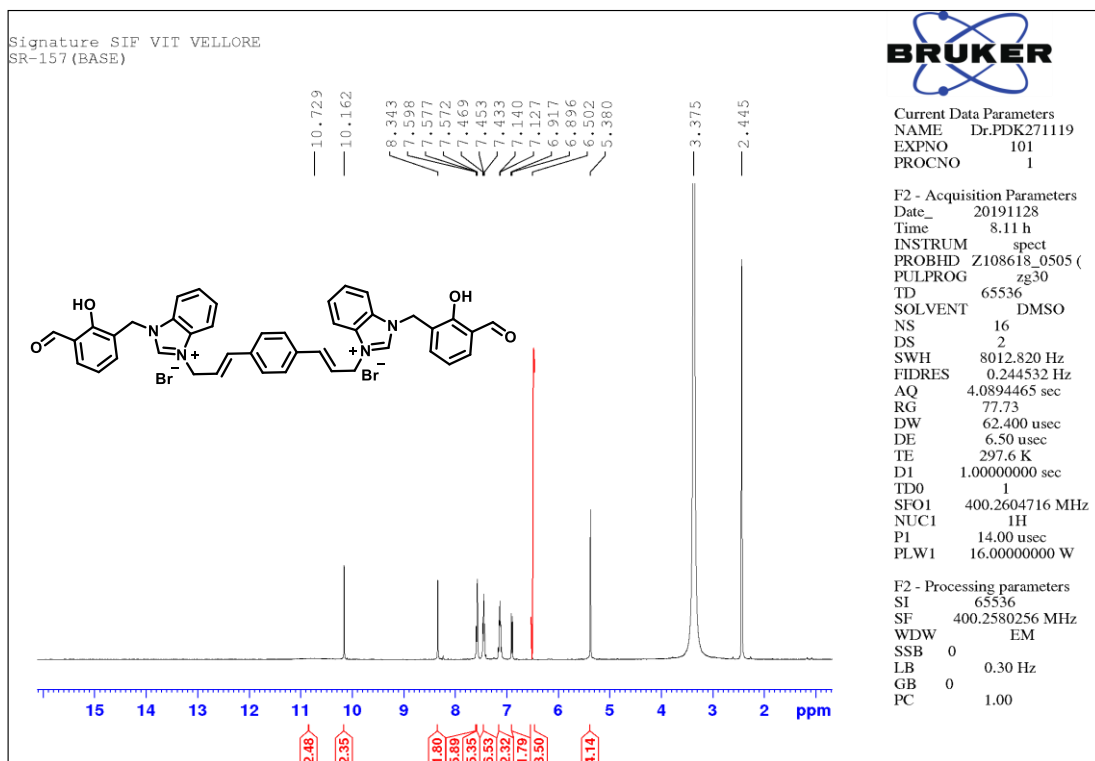

Fig.S11. <sup>1</sup>H NMR spectrum of compound 4E

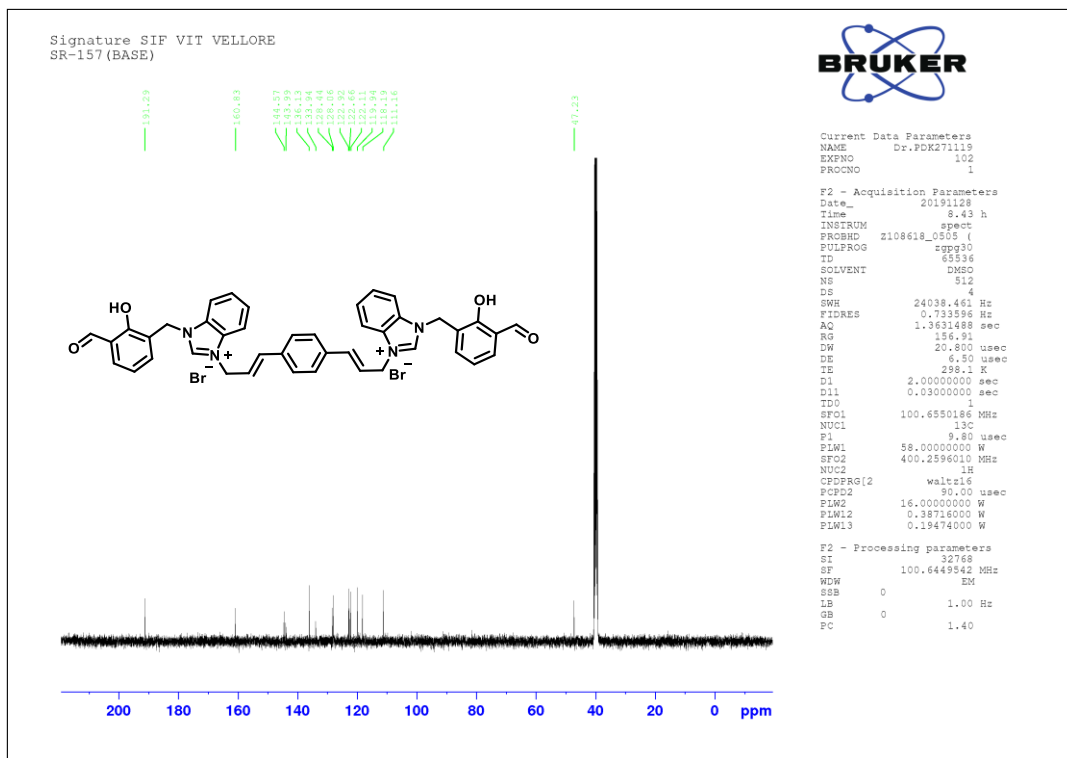

Fig.S12. <sup>13</sup>C NMR spectrum of compound 4E

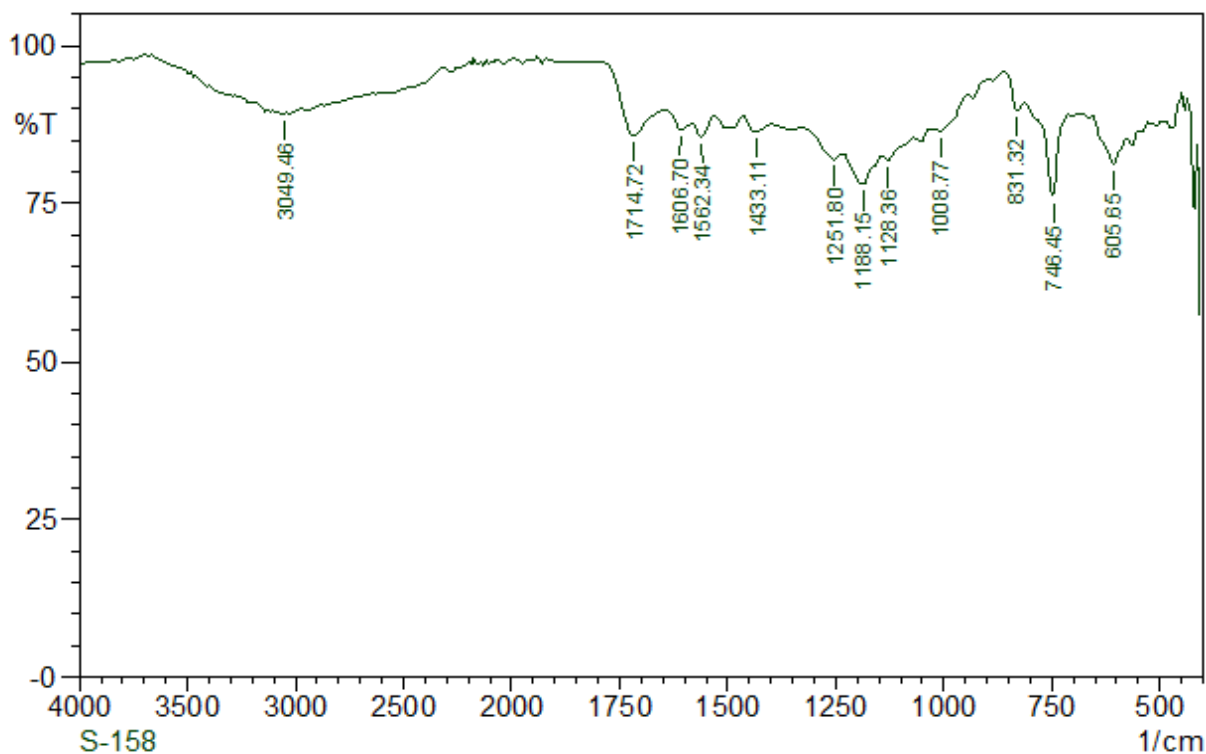

Fig.S13. .FT-IR spectrum of compound 4E

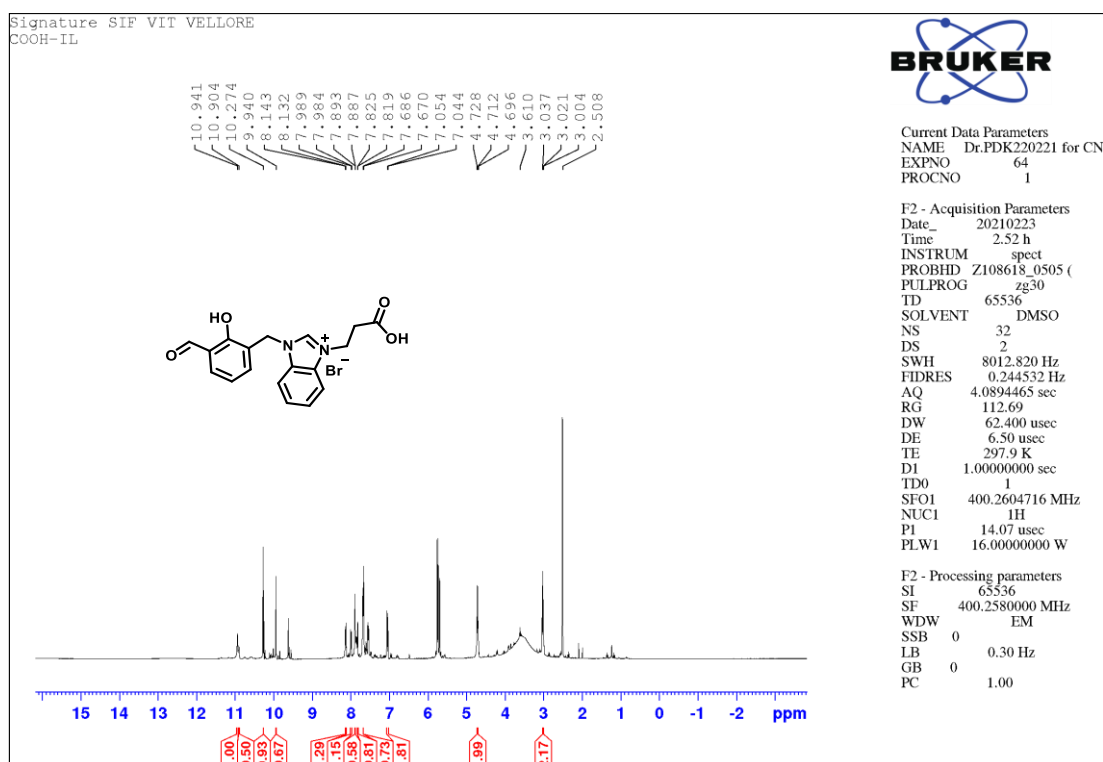

Fig.S14. <sup>1</sup>H NMR spectrum of compound 4F

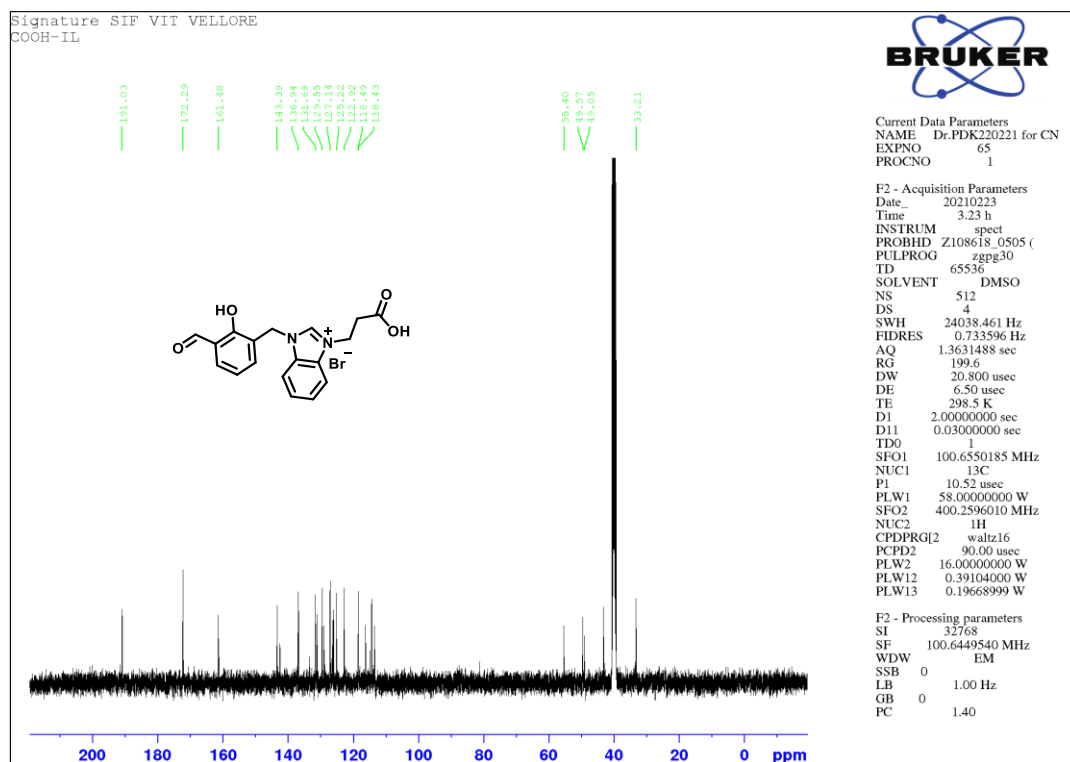

Fig.S15.  $^{13}\text{C}$ NMR spectrum of compound 4F

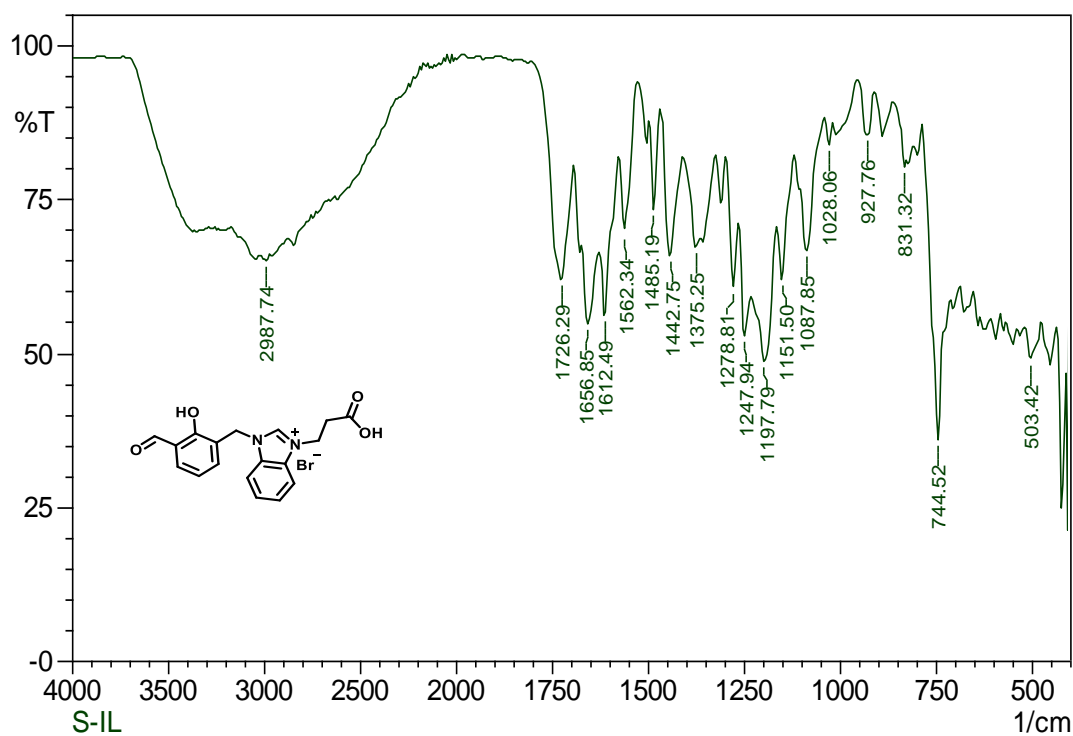

Fig.S16. FT-IR spectrum of compound 4F

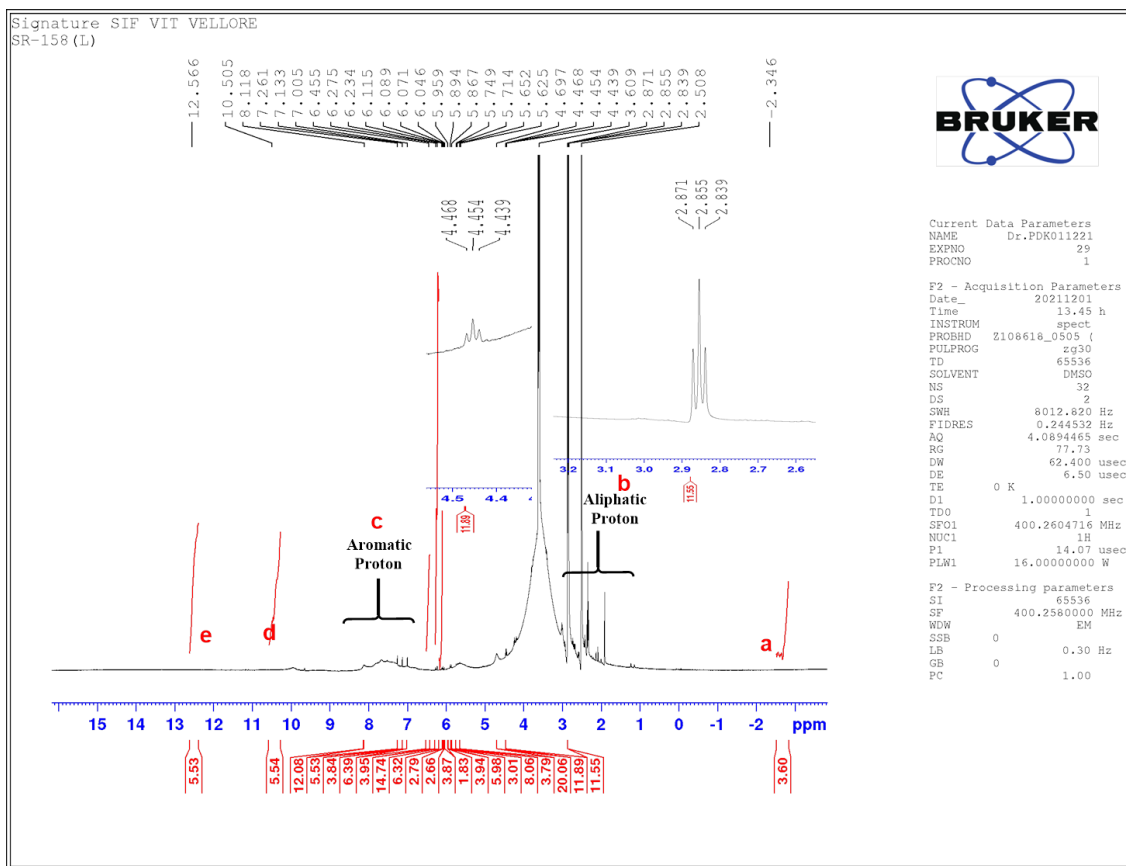

Fig.S17.  $^1\text{H}$  NMR spectrum of Photocatalyst (MFBBCFPc)

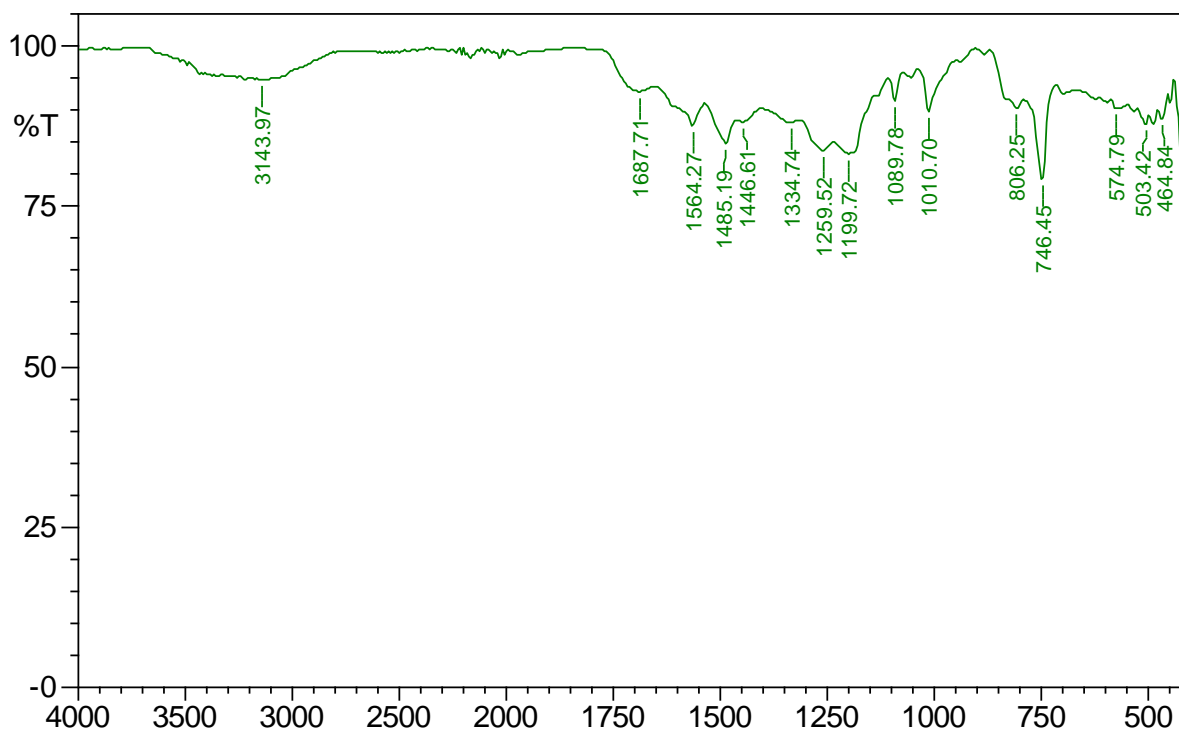

Fig.S18. FT-IR spectrum of Photocatalyst (MFBBCFPc)

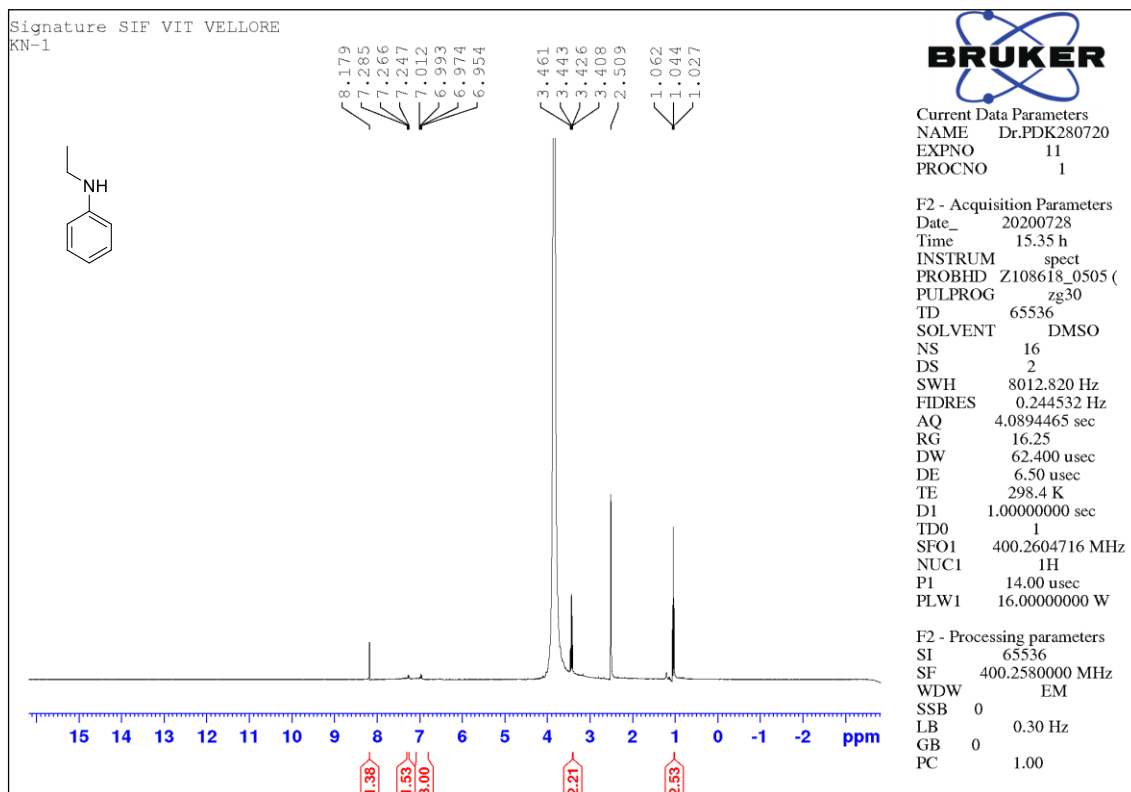

Fig.S19  $^1\text{H}$  NMR spectrum of N-ethyl aniline (D1)

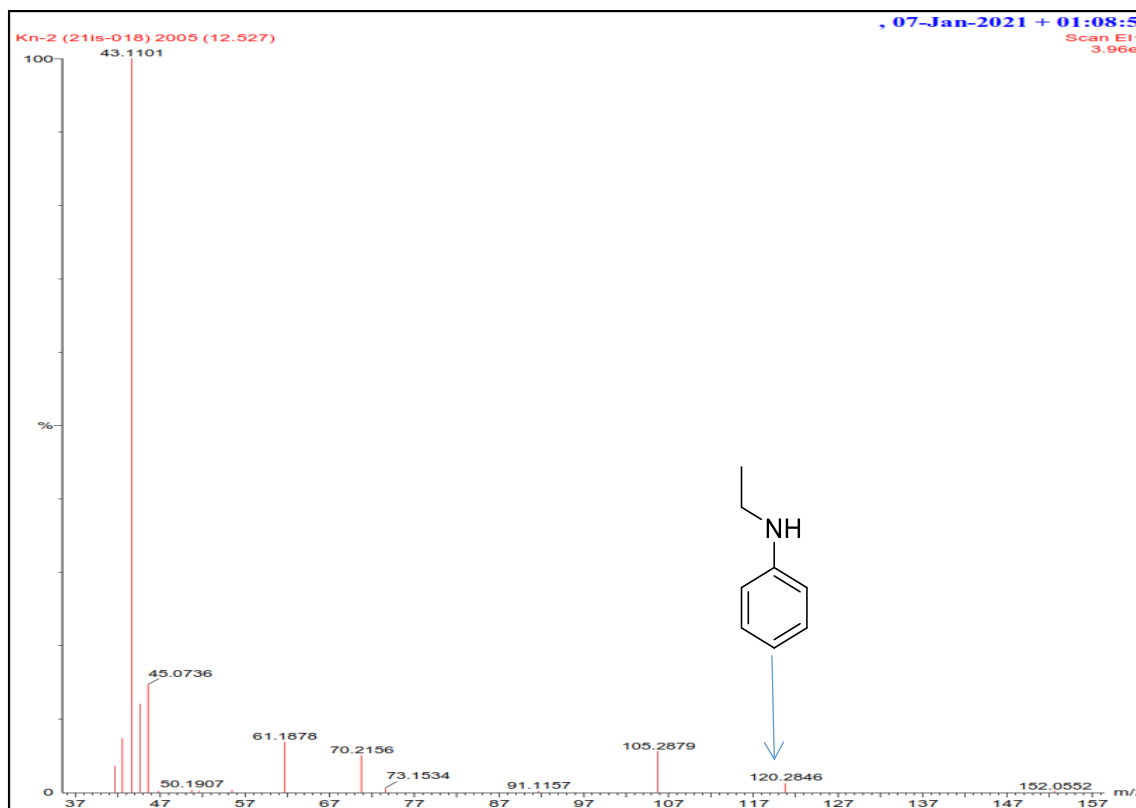

Fig.S20 GCMS spectrum of N-ethyl aniline (D1)

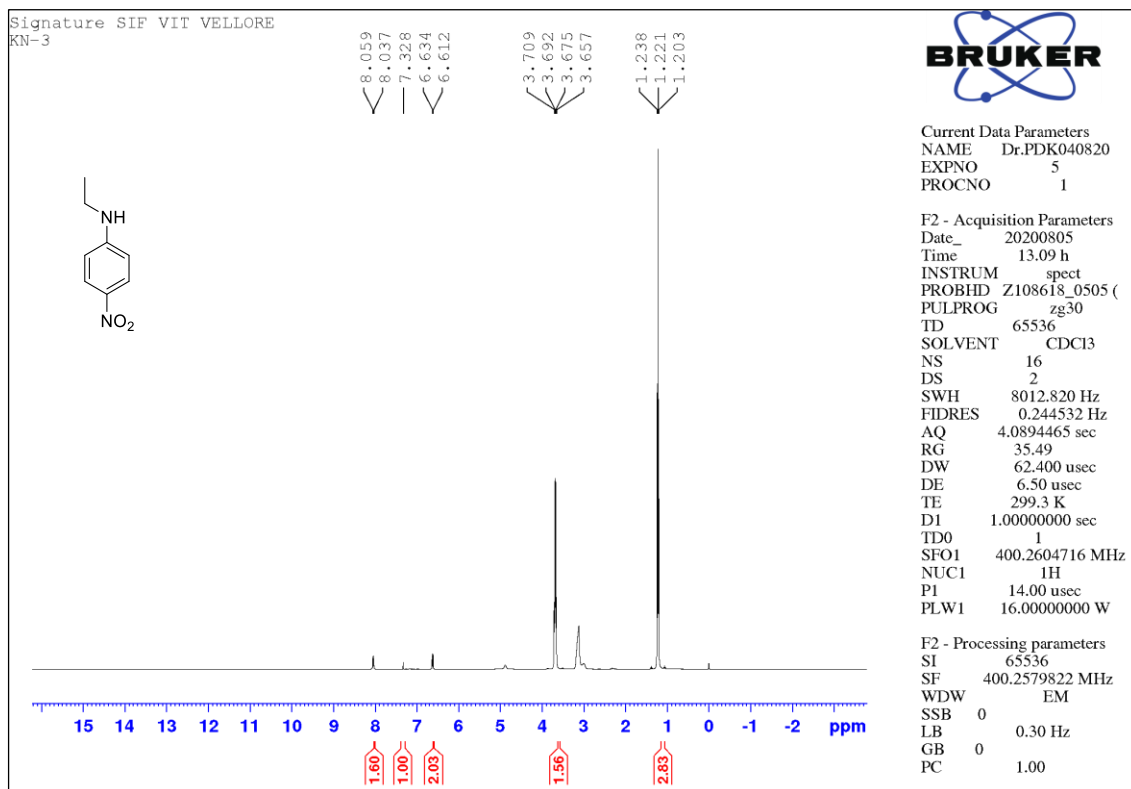

Fig.S21.  $^1\text{H}$  NMR spectrum of N-ethyl-4-nitroaniline (D2)

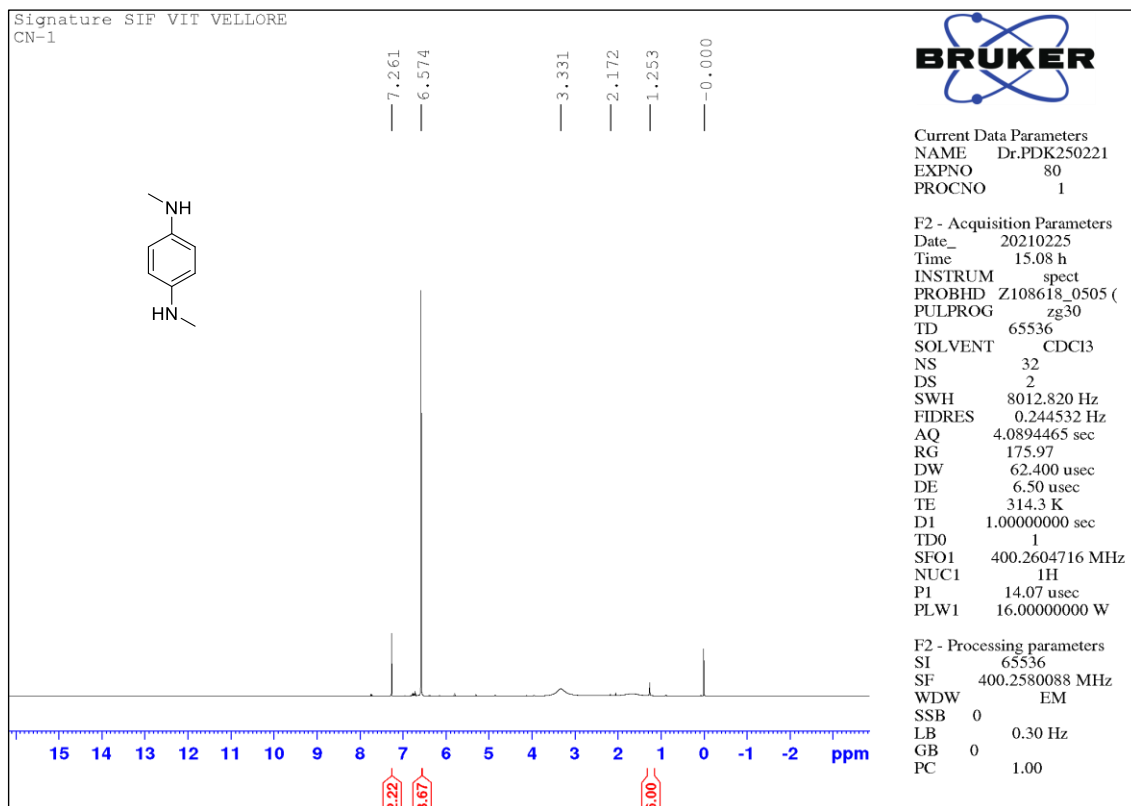

Fig.S22  $^1\text{H}$  NMR spectrum of  $\text{N}^1, \text{N}^4$ -dimethylbenzene-1,4-diamine (D3)

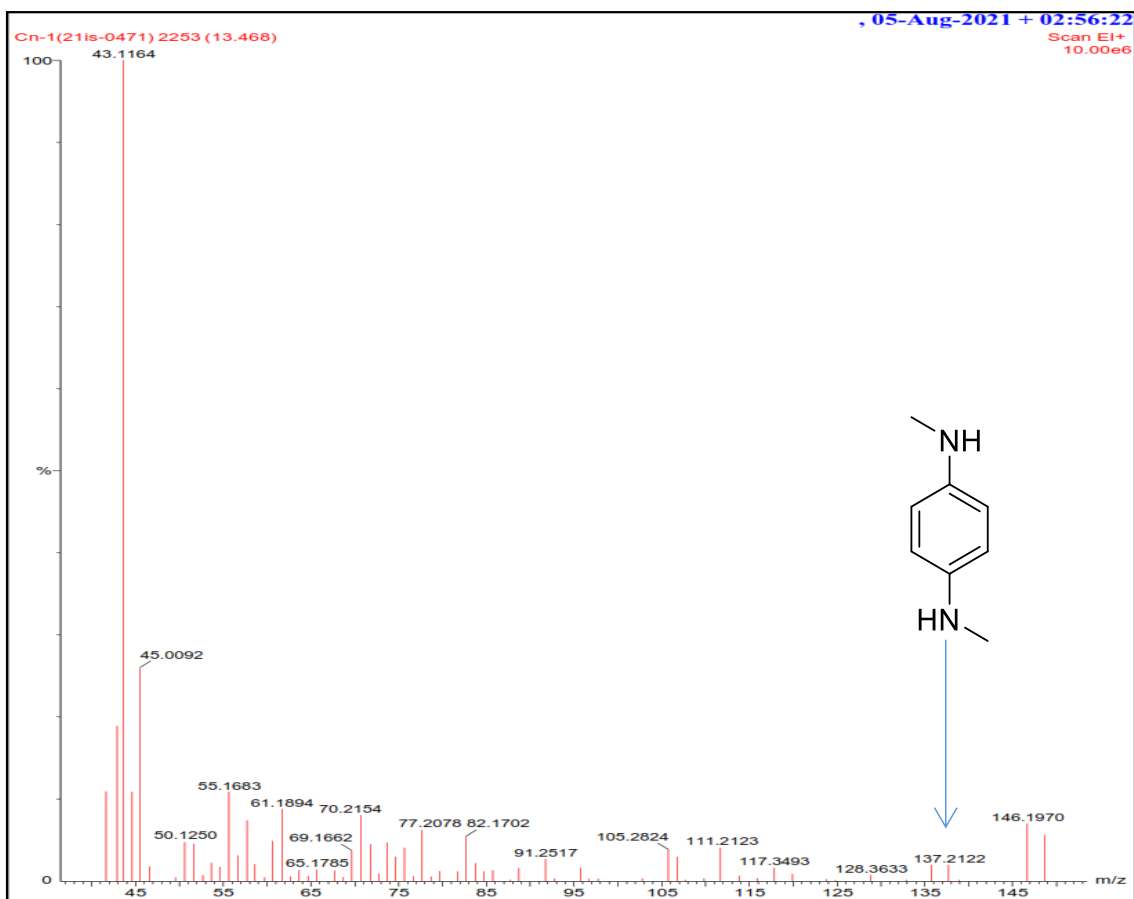

Fig.S23 GCMS spectrum of  $N^1, N^4$ -dimethylbenzene-1,4-diamine (D3)

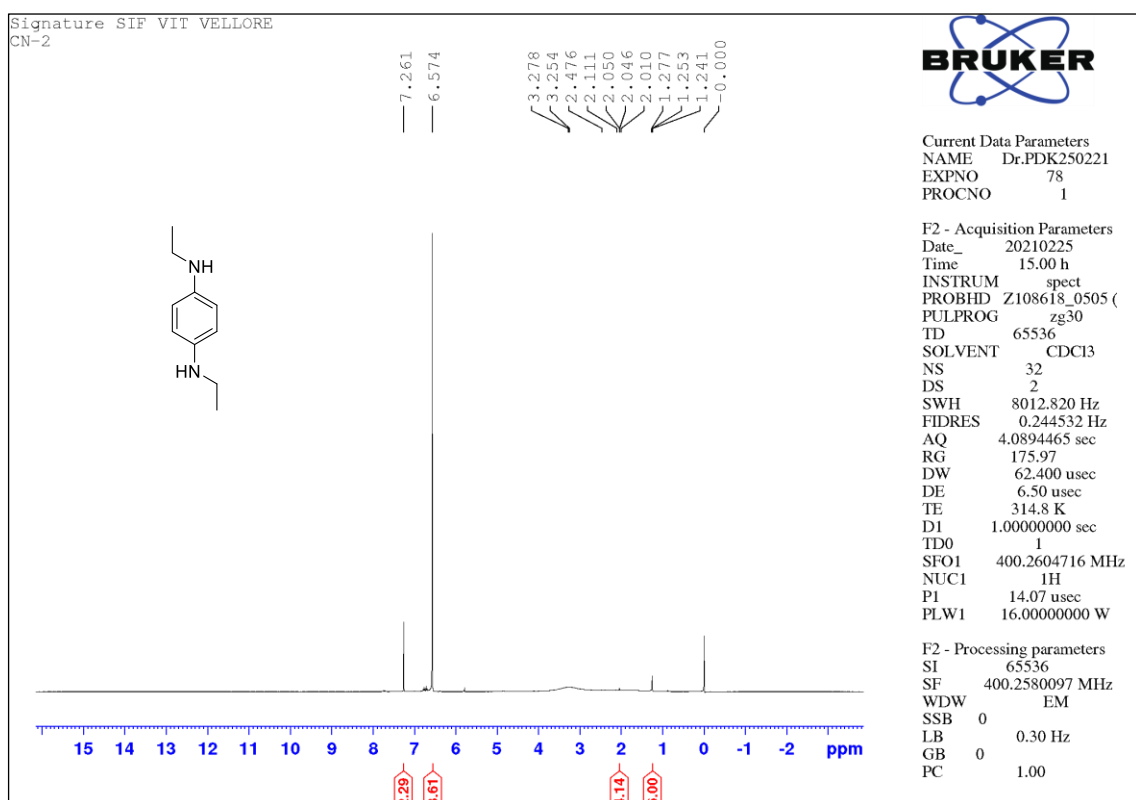

Fig.S24  $^1\text{H}$  NMR spectrum of  $N^1, N^4$ -diethylbenzene-1,4-diamine (D4)

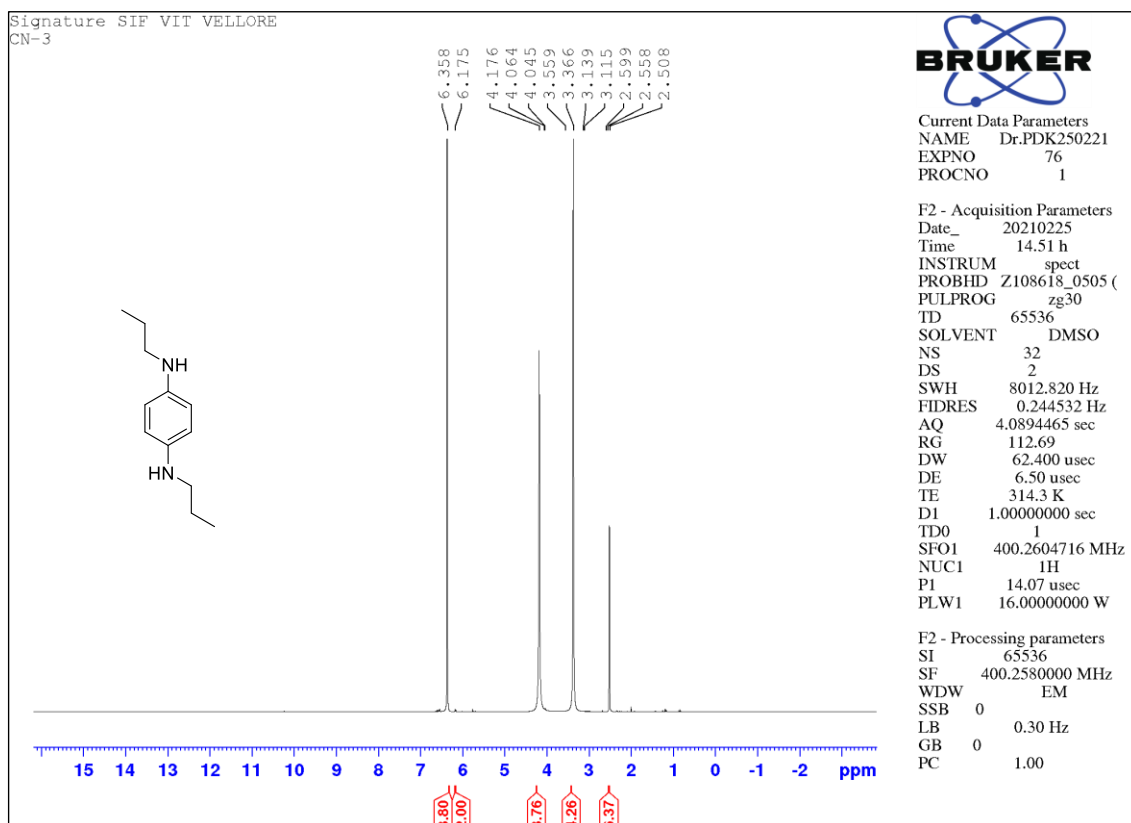

Fig.S25  $^1\text{H}$  NMR spectrum of  $\text{N}^1, \text{N}^4$ -dipropylbenzene-1, 4-diamine (**D5**)

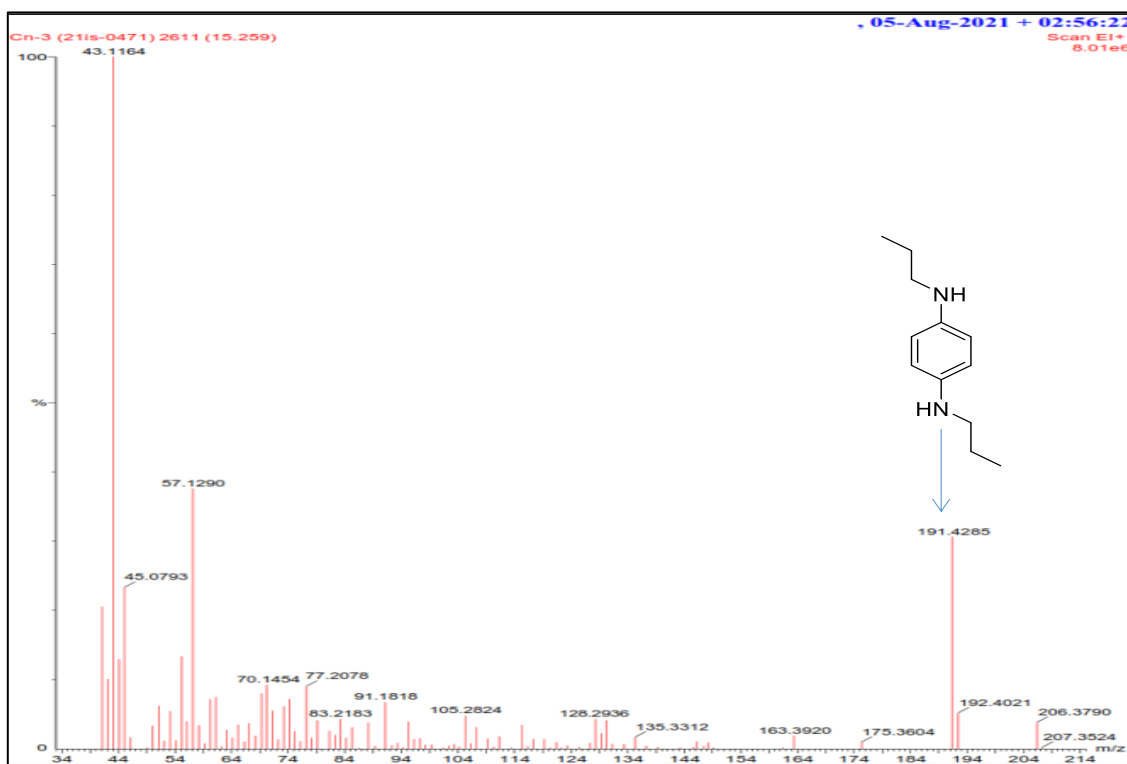

Fig.S26 GCMS Spectrum of  $\text{N}^1, \text{N}^4$ -Dipropylbenzene-1,4-diamine (**D5**)



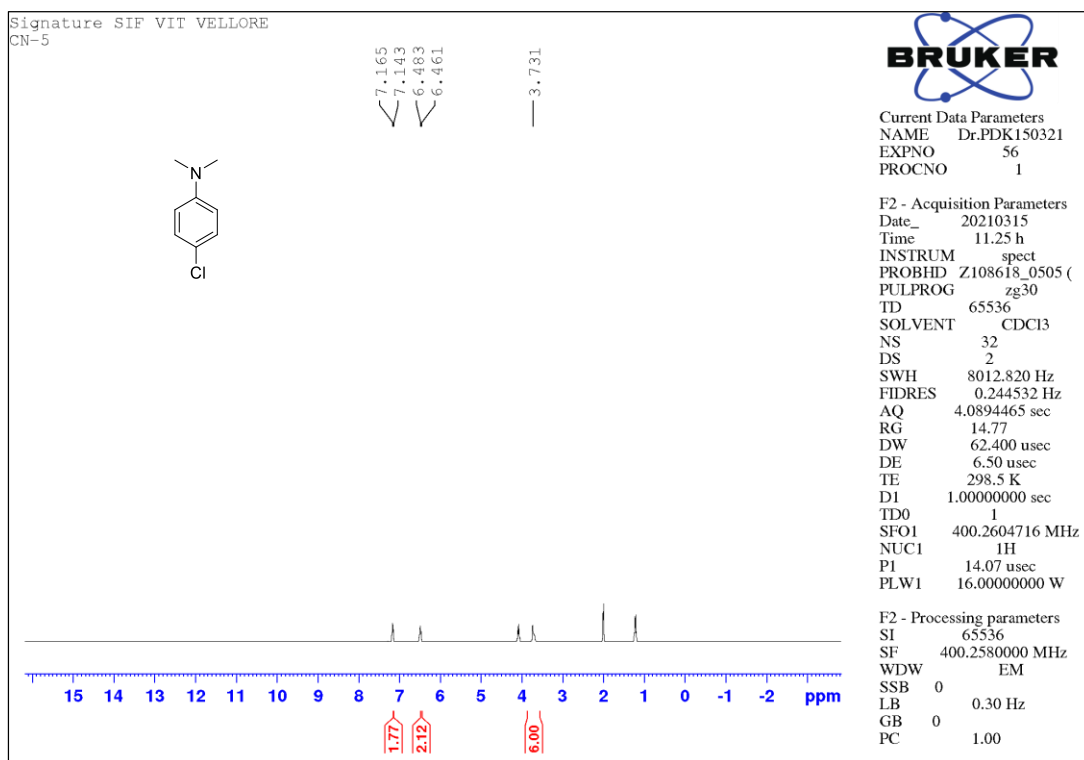

Fig.S.27  $^1\text{H}$  NMR spectrum of 4-chloro-N, N-dimethyl aniline (**D6**)

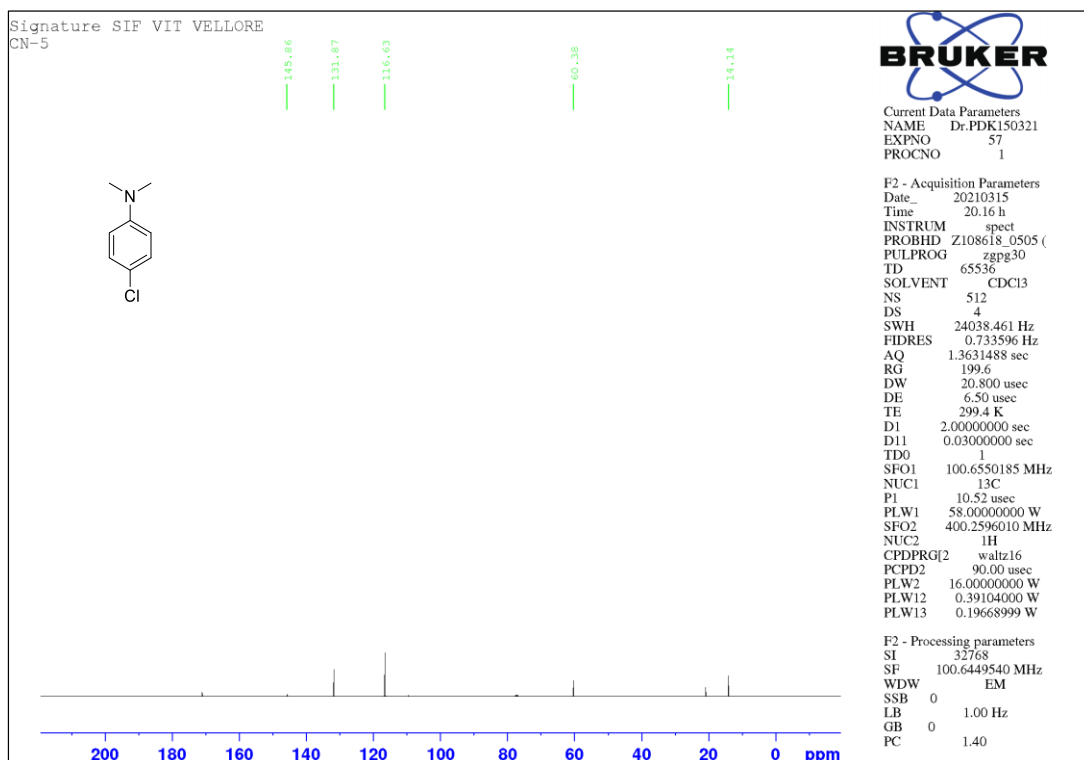

Fig. S28  $^{13}\text{C}$  NMR spectrum of 4-chloro-N, N-dimethyl aniline (**D6**)

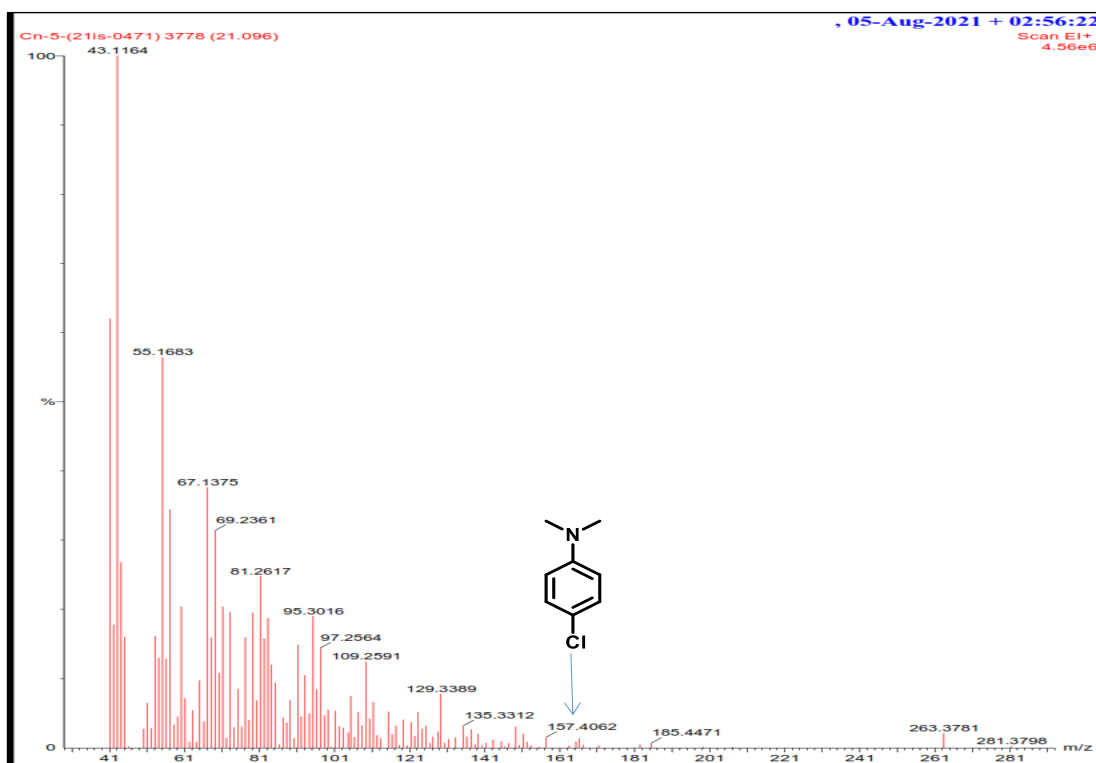

Fig.S29 GCMS spectrum of 4-chloro-N, N-dimethyl aniline (D6)

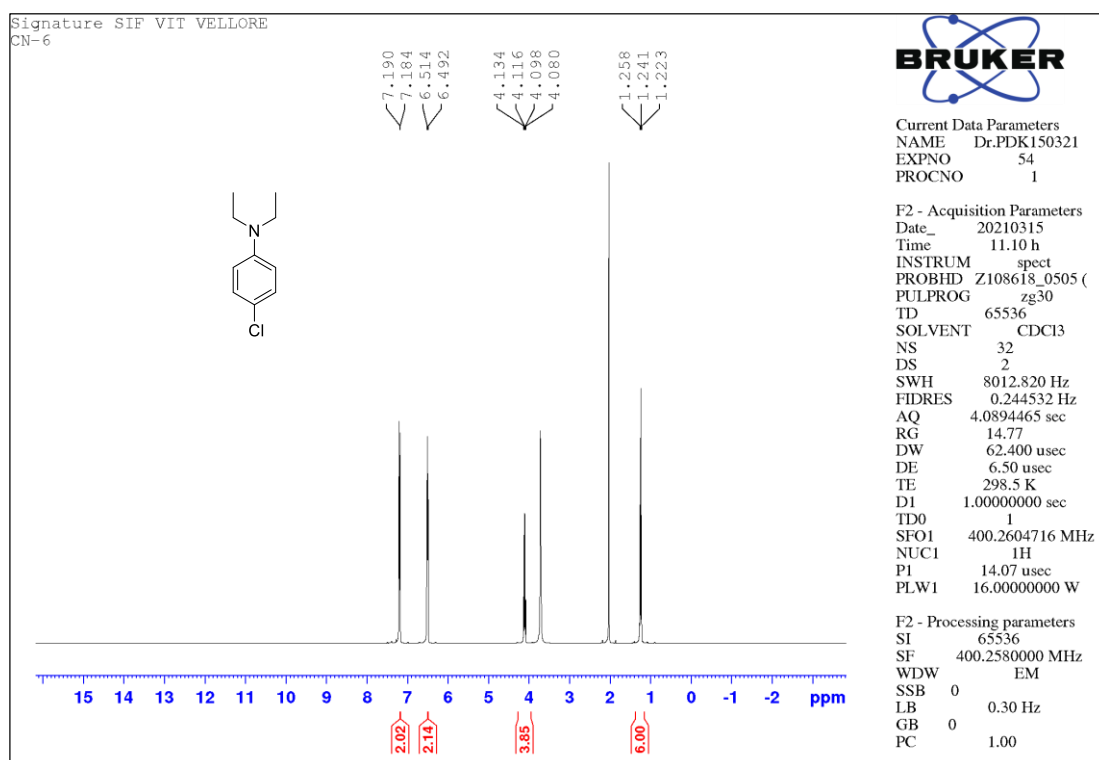

Fig. S30 <sup>1</sup>H NMR spectrum of 4-chloro-N,N-diethylaniline (D7)

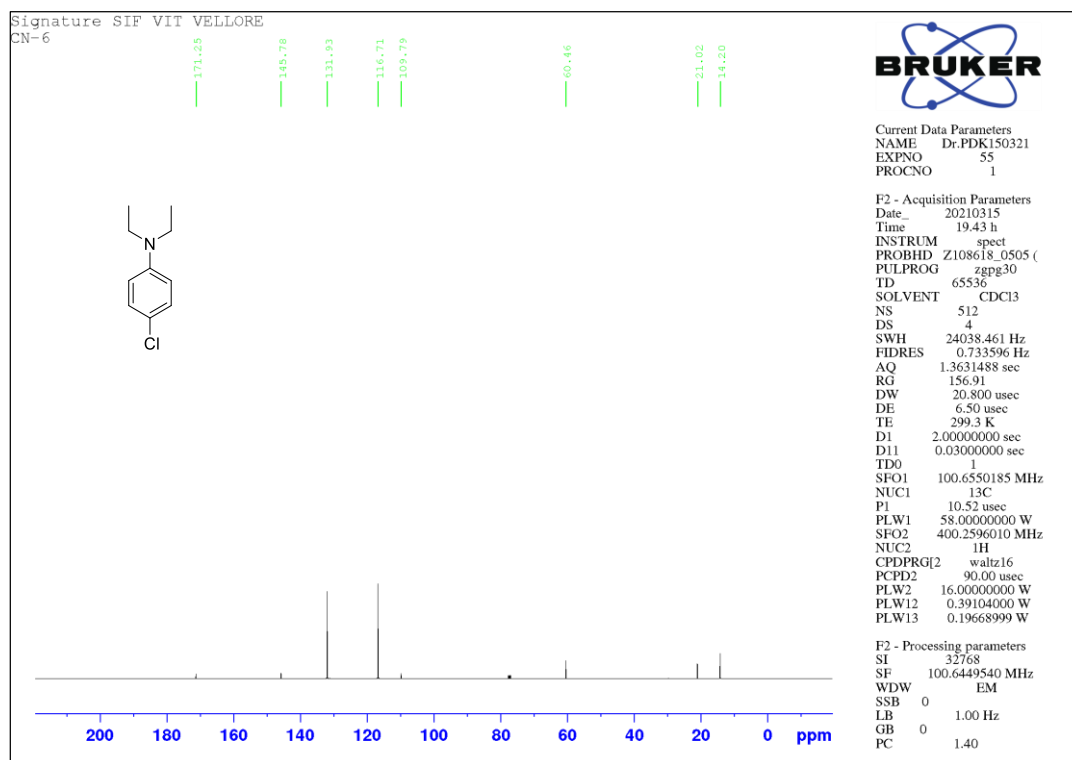

Fig. S31  $^{13}\text{C}$  NMR spectrum of 4-chloro-N,N-diethylaniline (**D7**)

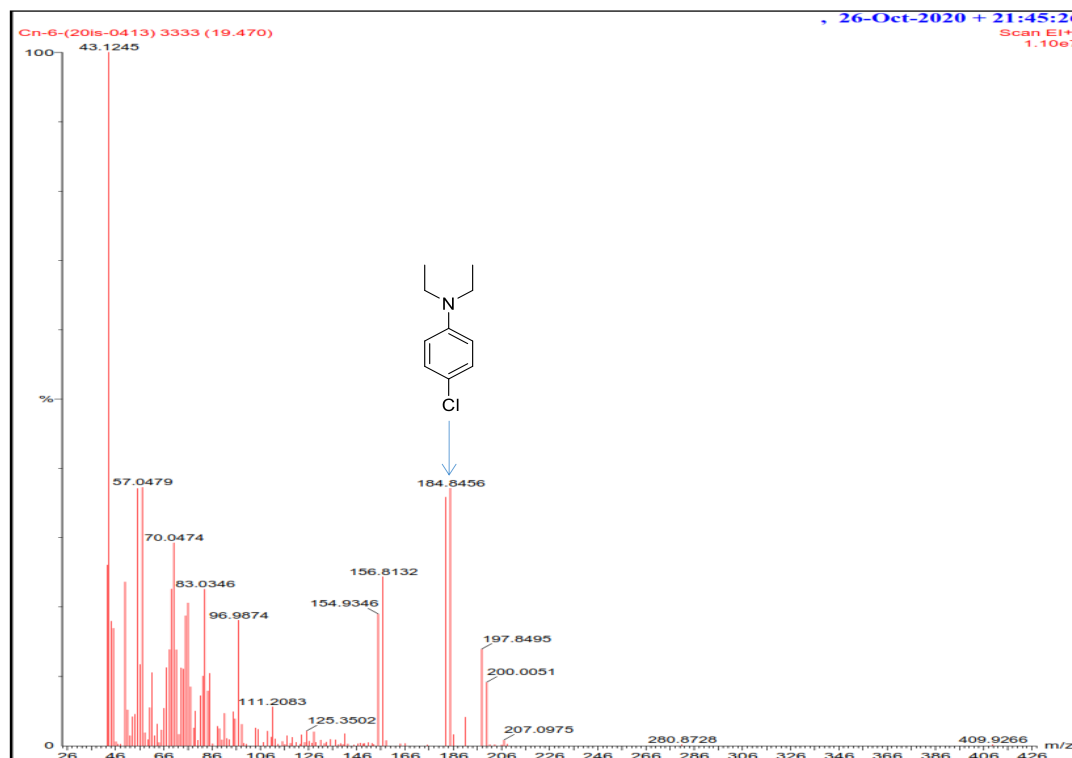

Fig. S32 GCMS spectrum of 4-chloro-N,N-diethylaniline (**D7**)

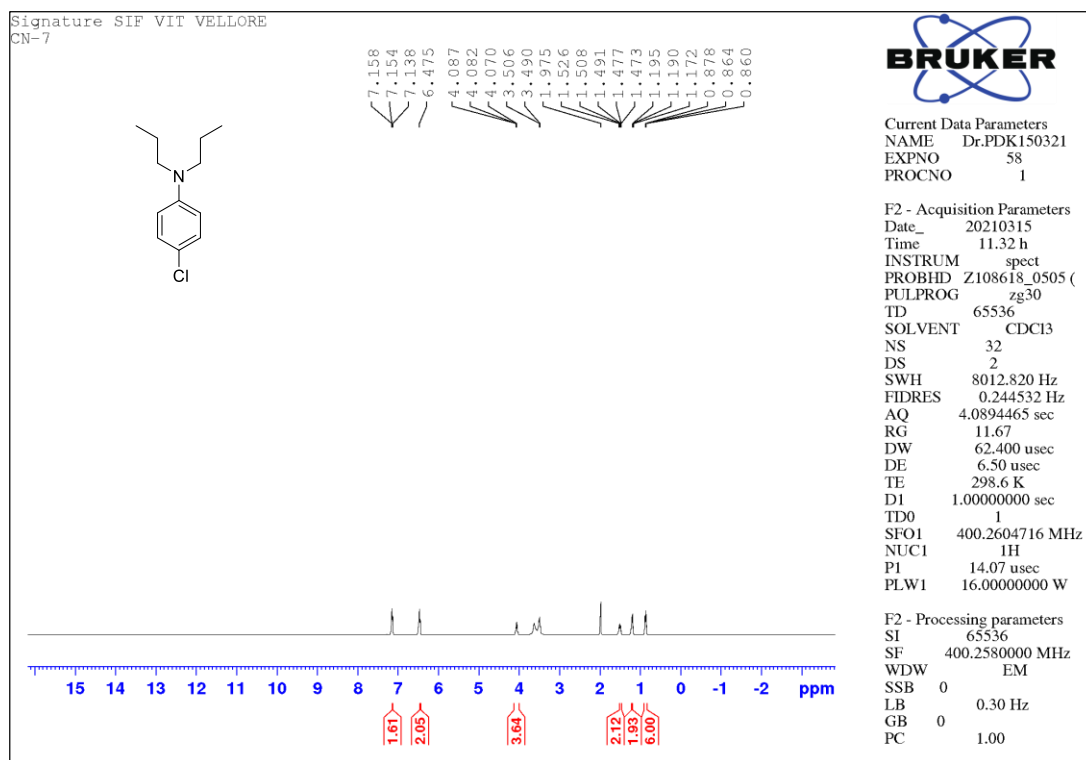

Fig. S33  $^1\text{H}$  NMR spectrum of 4-chloro-N,N-dipropylaniline (**D8**)

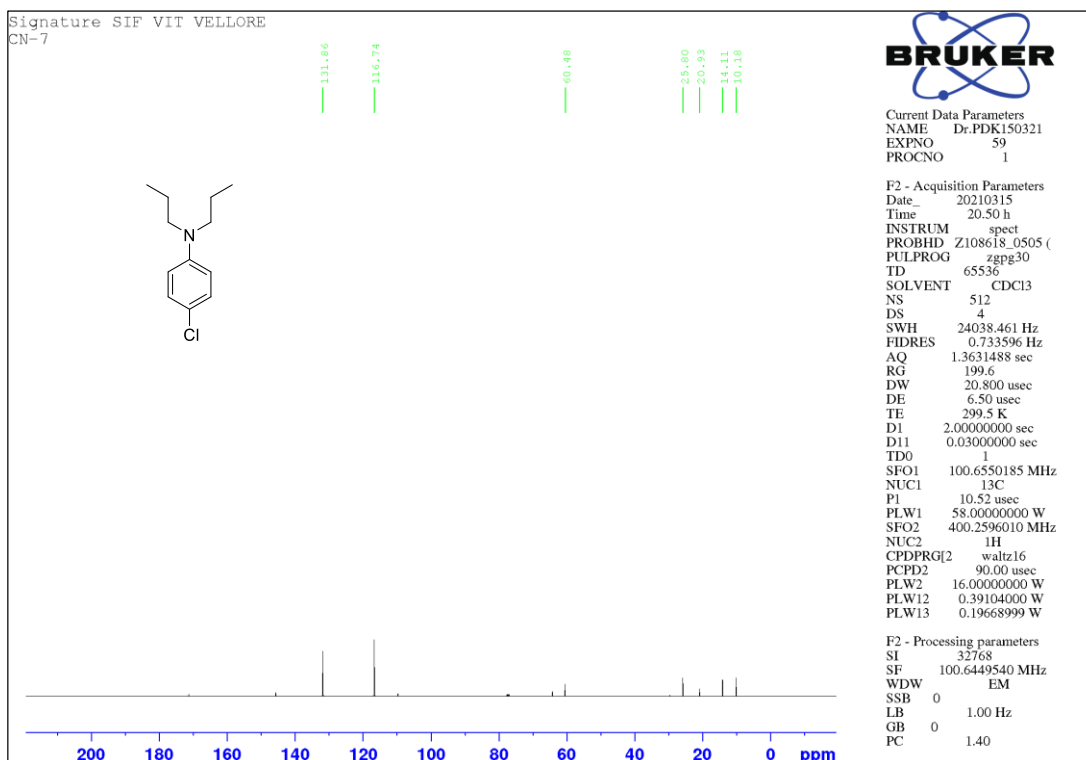

Fig. S34  $^{13}\text{C}$  NMR spectrum of 4-chloro-N,N-dipropylaniline (**D8**)

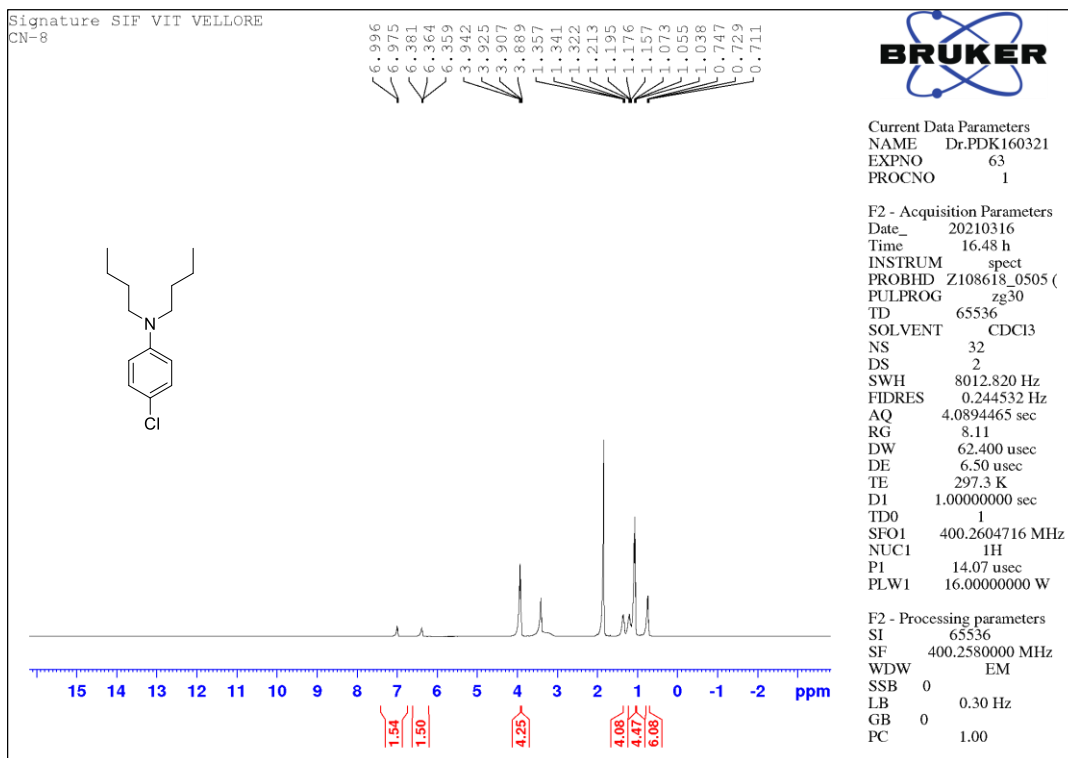

Fig. S35  $^1\text{H}$  NMR spectrum of 4-chloro-N, N-dibutylaniline (**D9**)

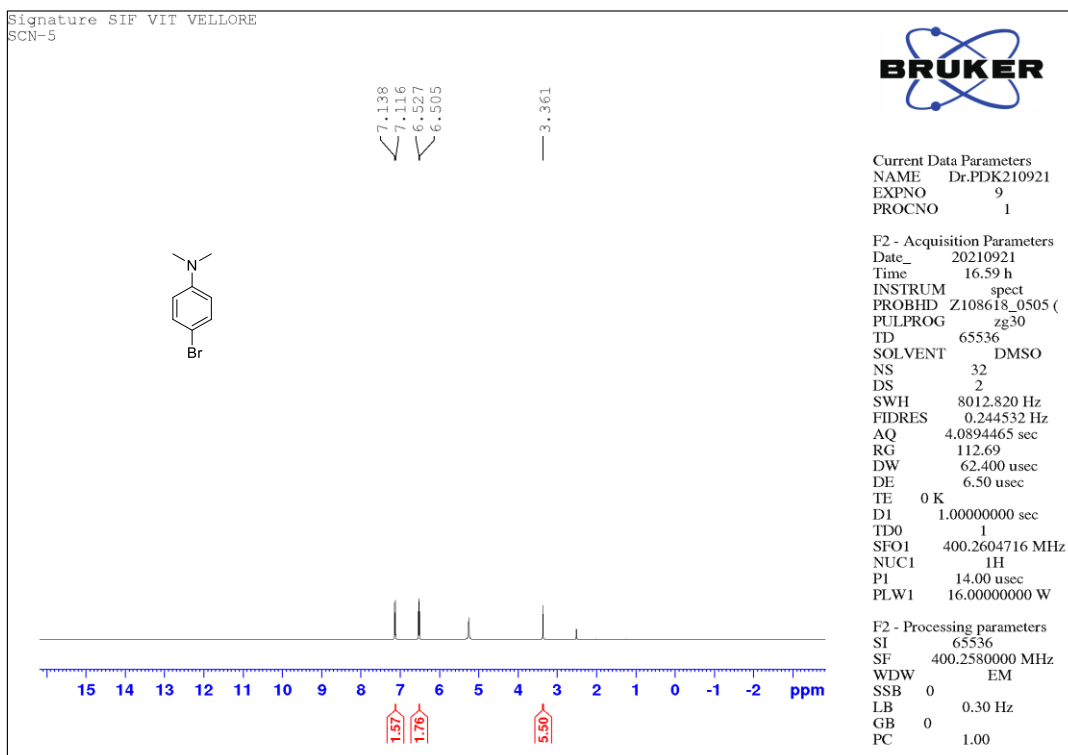

Fig. S36  $^1\text{H}$  NMR spectrum of 4-bromo-N,N-dimethylaniline (**D10**)

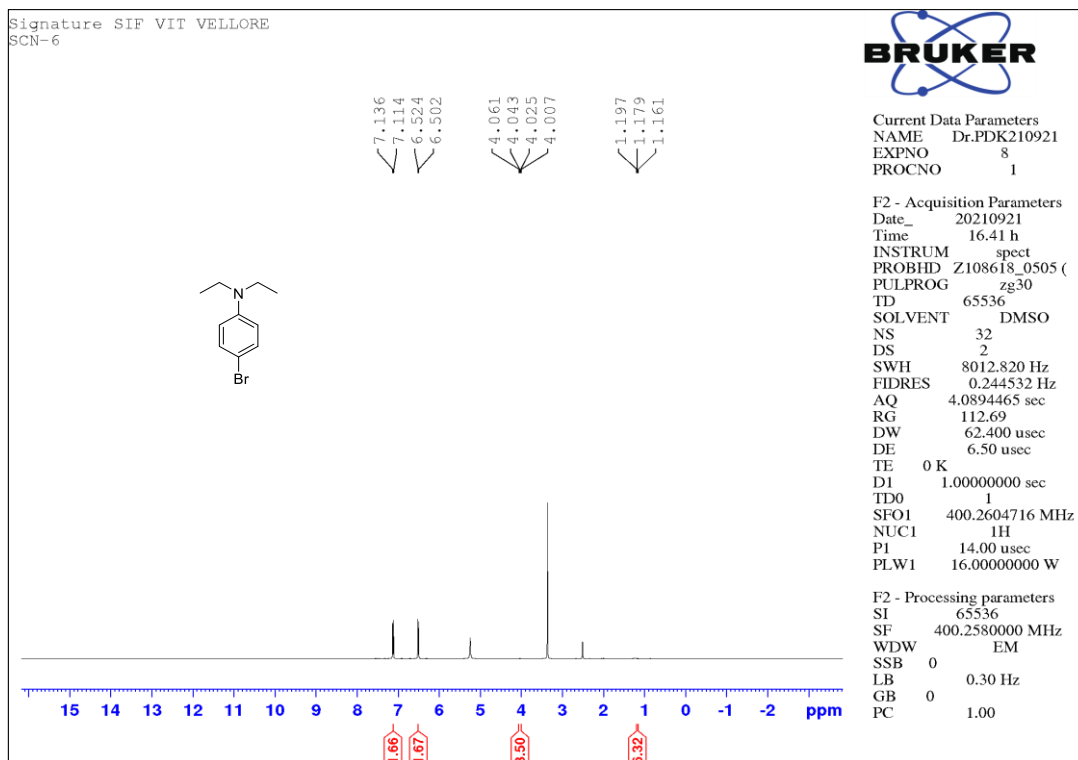

Fig.S37  $^1\text{H}$  NMR spectrum of 4-bromo-N,N-diethylaniline (D11)

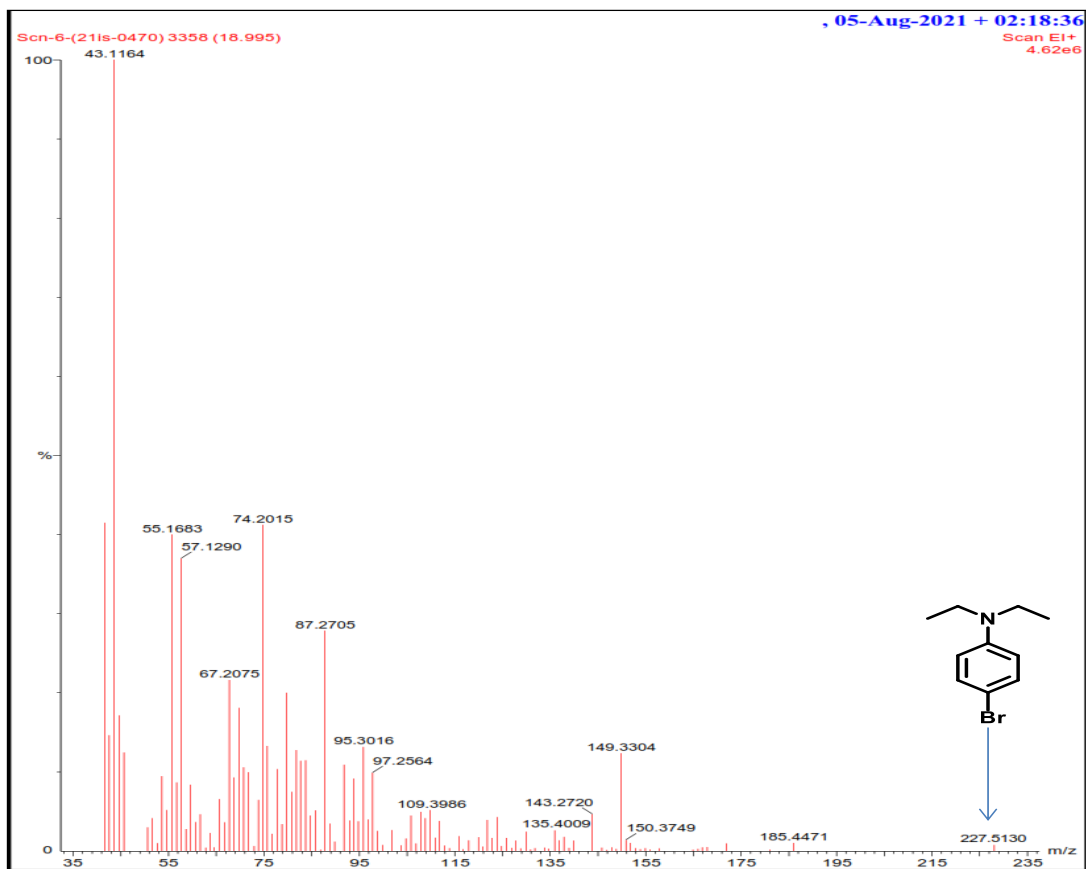

Fig. S38 GCMS spectrum of 4-bromo-N,N-diethylaniline (D11)

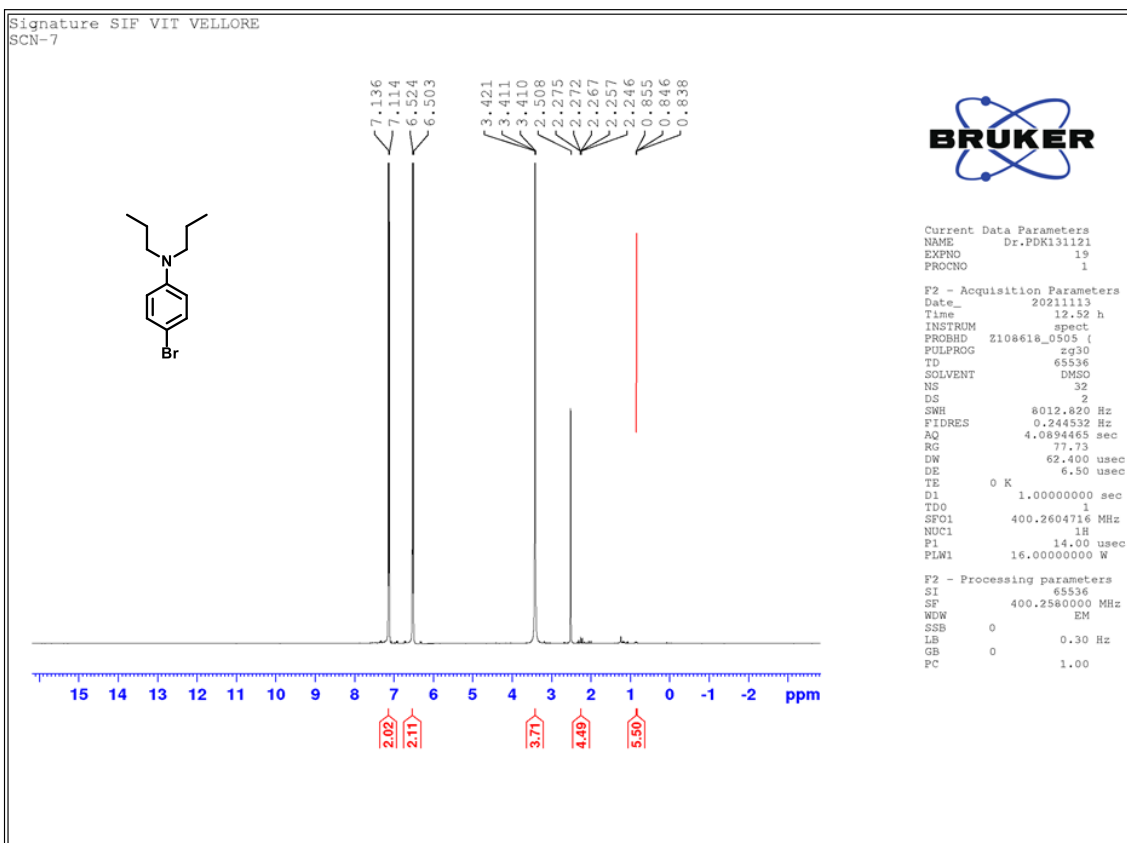

Fig.S39  $^1\text{H}$  NMR 4-bromo-N, N-dipropylaniline (D12)

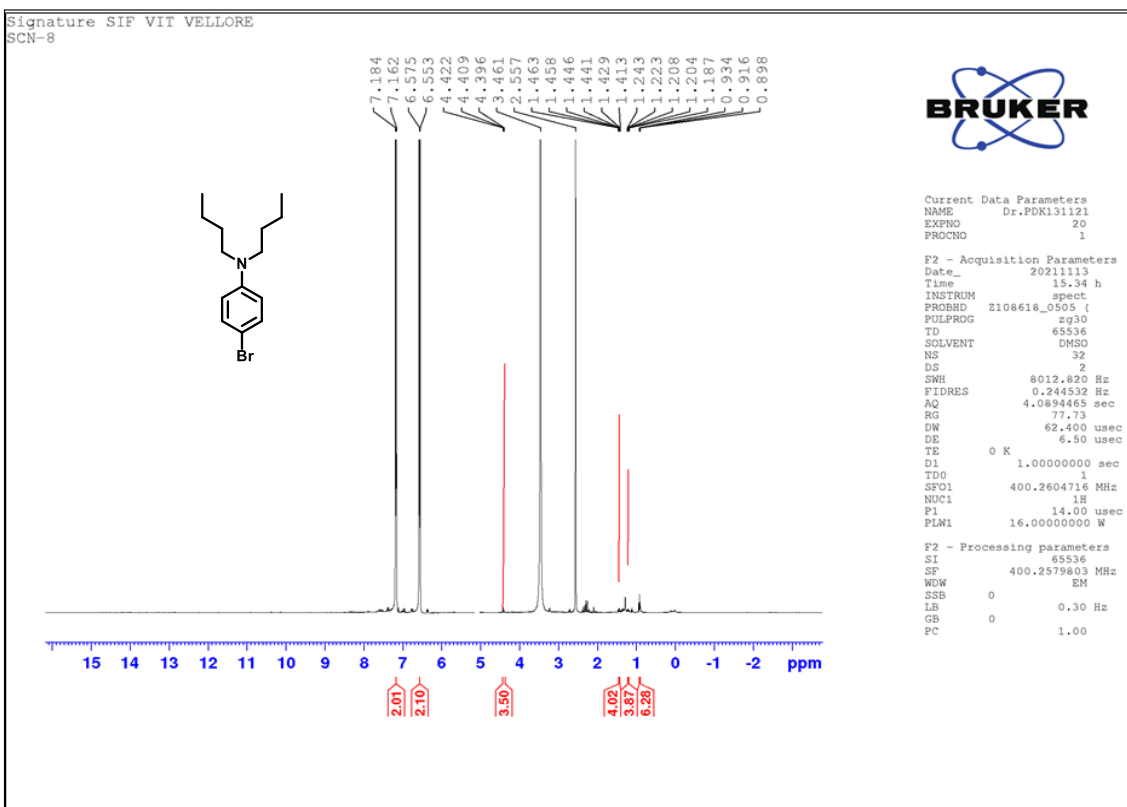

Fig. S40  $^1\text{H}$  NMR spectrum of 4-bromo-N, N-dibutylaniline (D13)

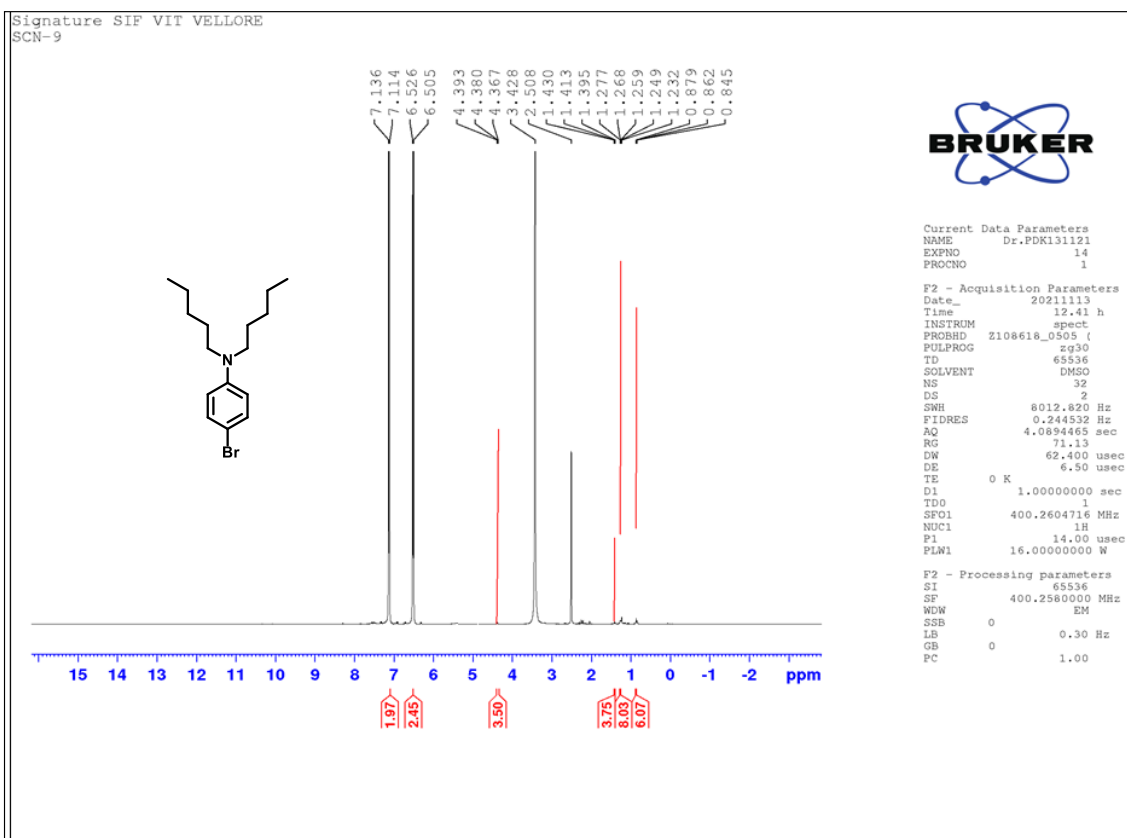

Fig. S41 <sup>1</sup>H NMR spectrum of 4-bromo-N, N-dipentylaniline (D14)

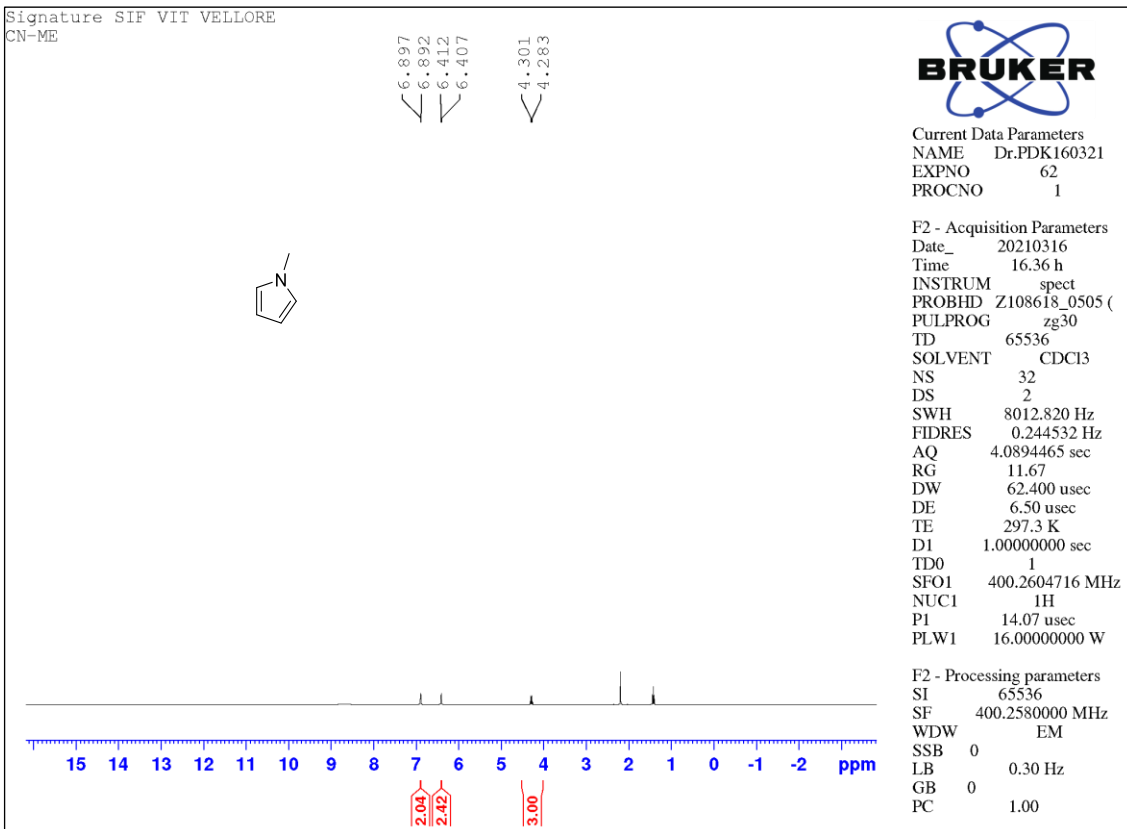

Fig. S42 <sup>1</sup>H NMR spectrum of 1-methyl-1H-pyrrole (D15)



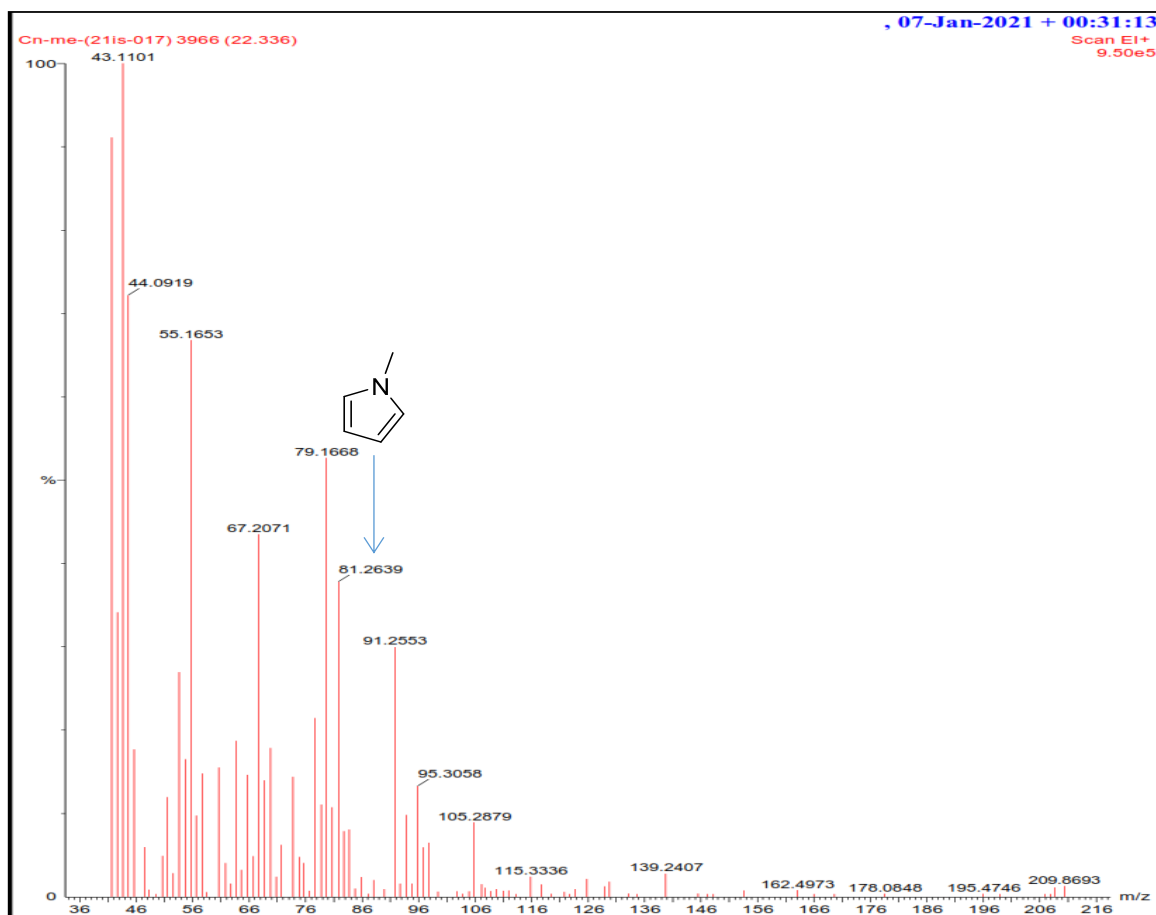

Fig. S43 GCMS spectrum of 1-methyl-1H-pyrrole (D15)

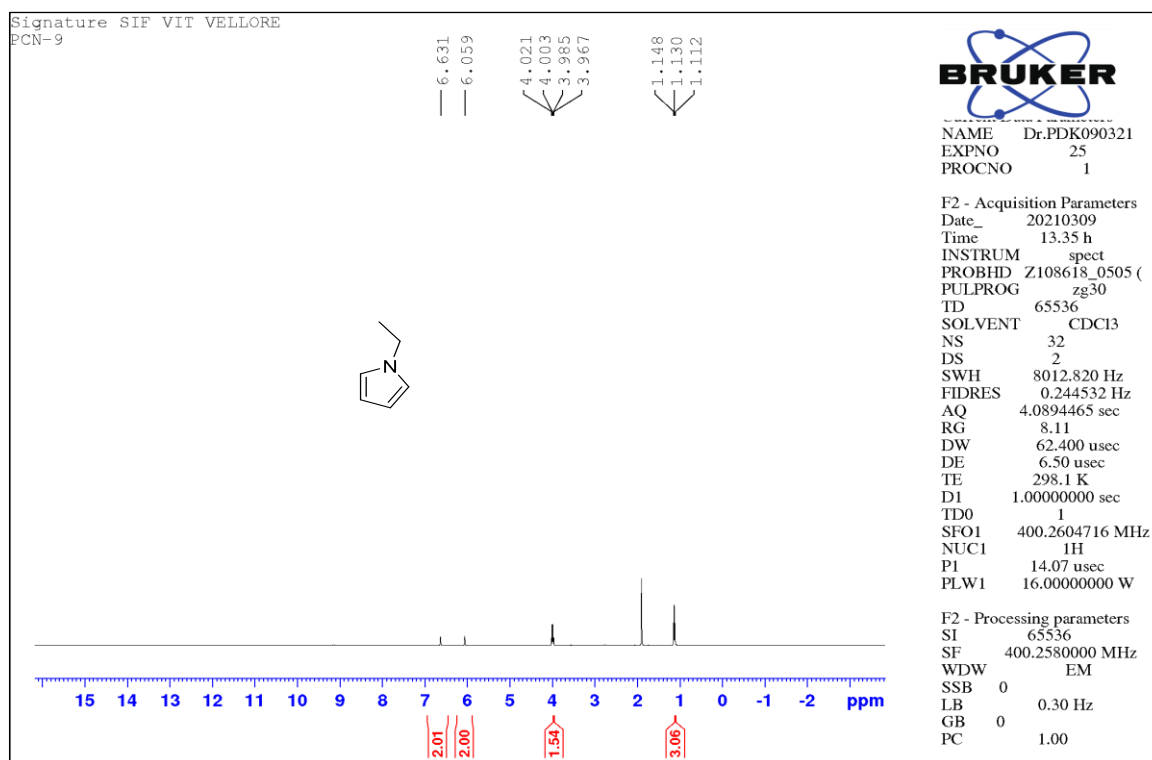

Fig. S44 <sup>1</sup>H NMR spectrum of 1-ethyl-1H-pyrrole (D16)

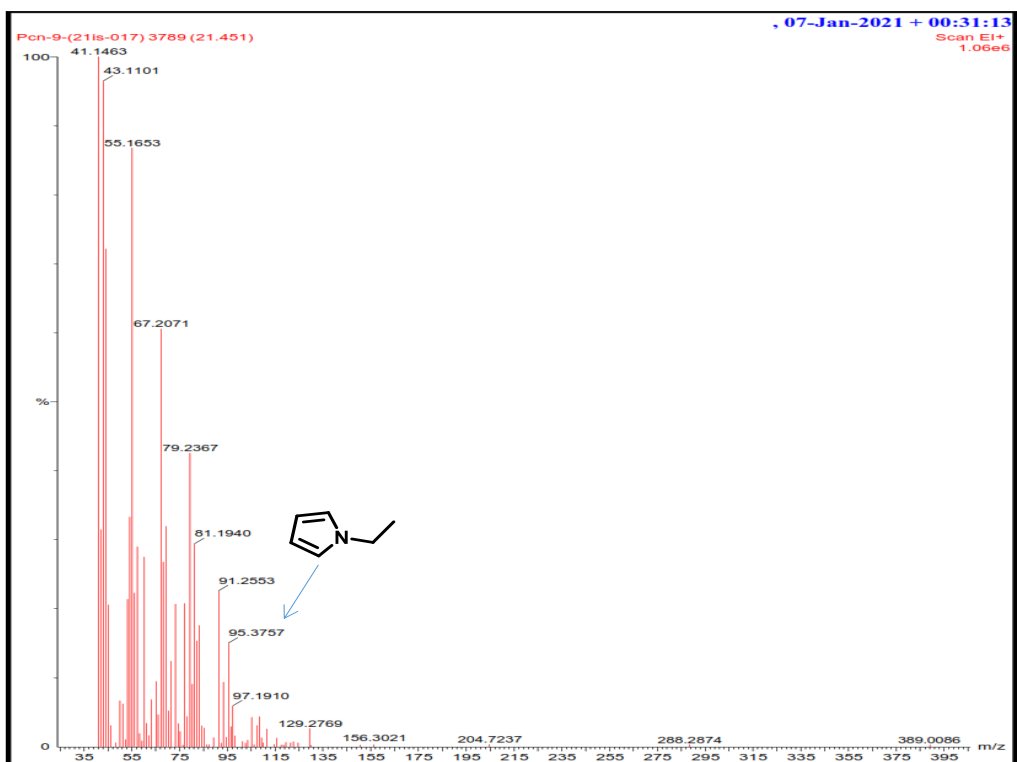

Fig. S45 GCMS spectrum of 1-ethyl-1H-pyrrole (D16)

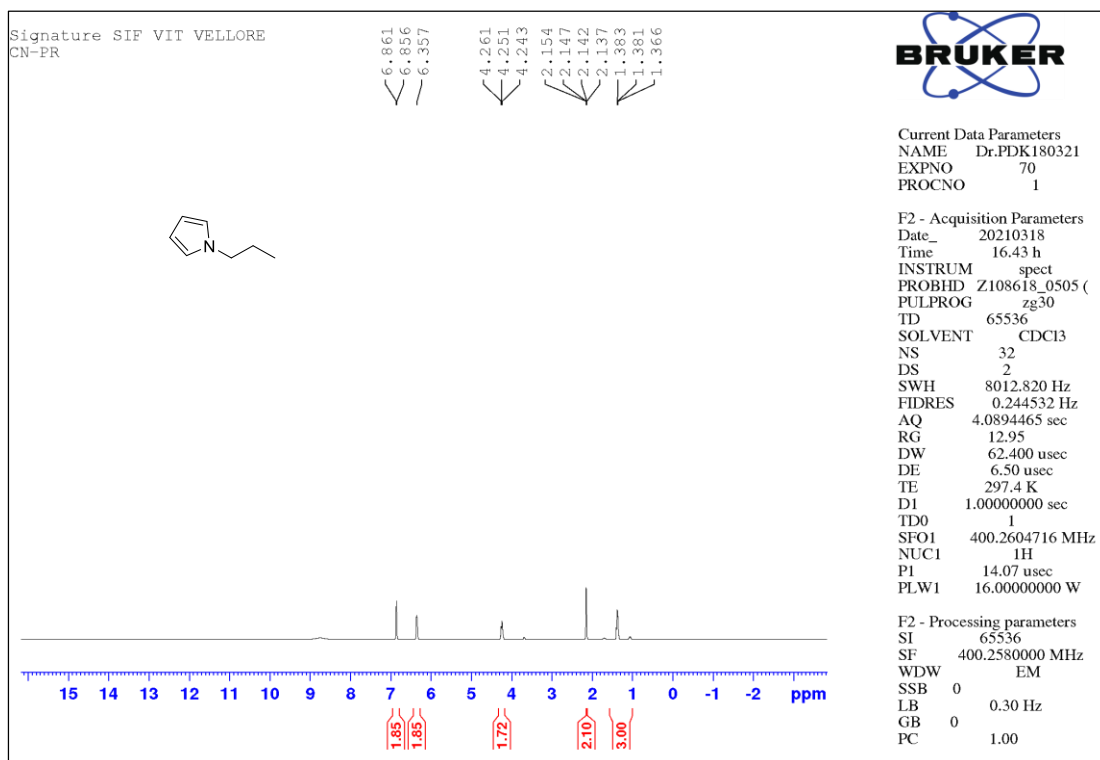

Fig. S46 <sup>1</sup>H NMR spectrum of 1-Propyl 1-1H-pyrrole (D17)

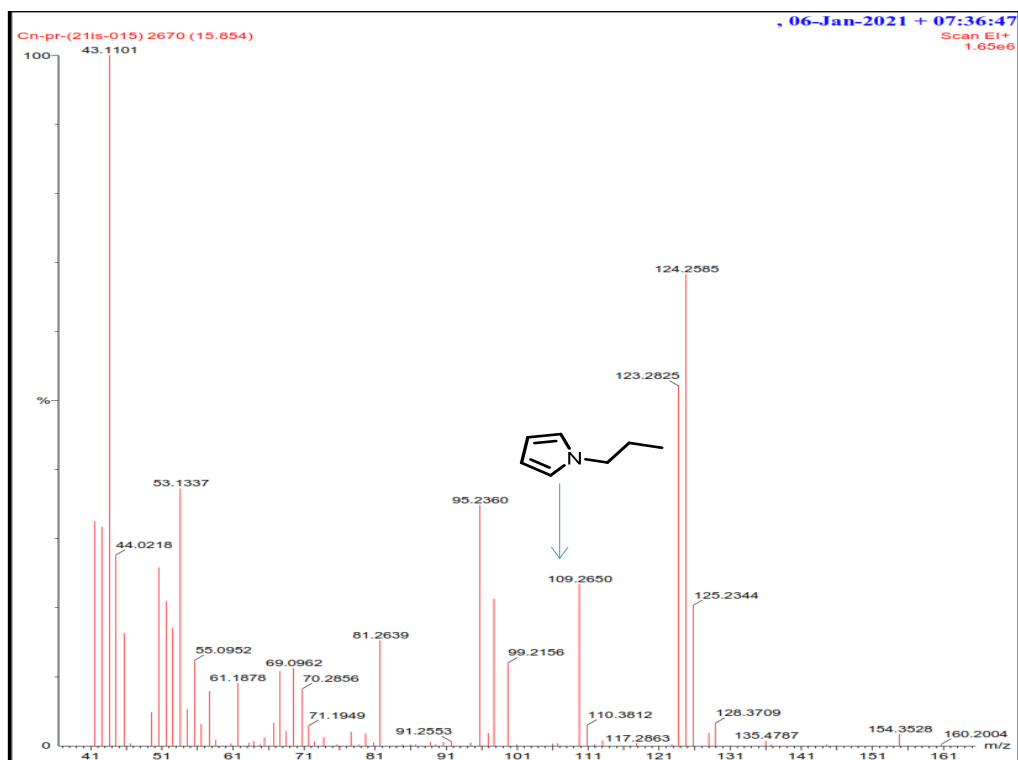

Fig. S47 GCMS spectrum of 1-Propyl 1-H-pyrrole (D17)

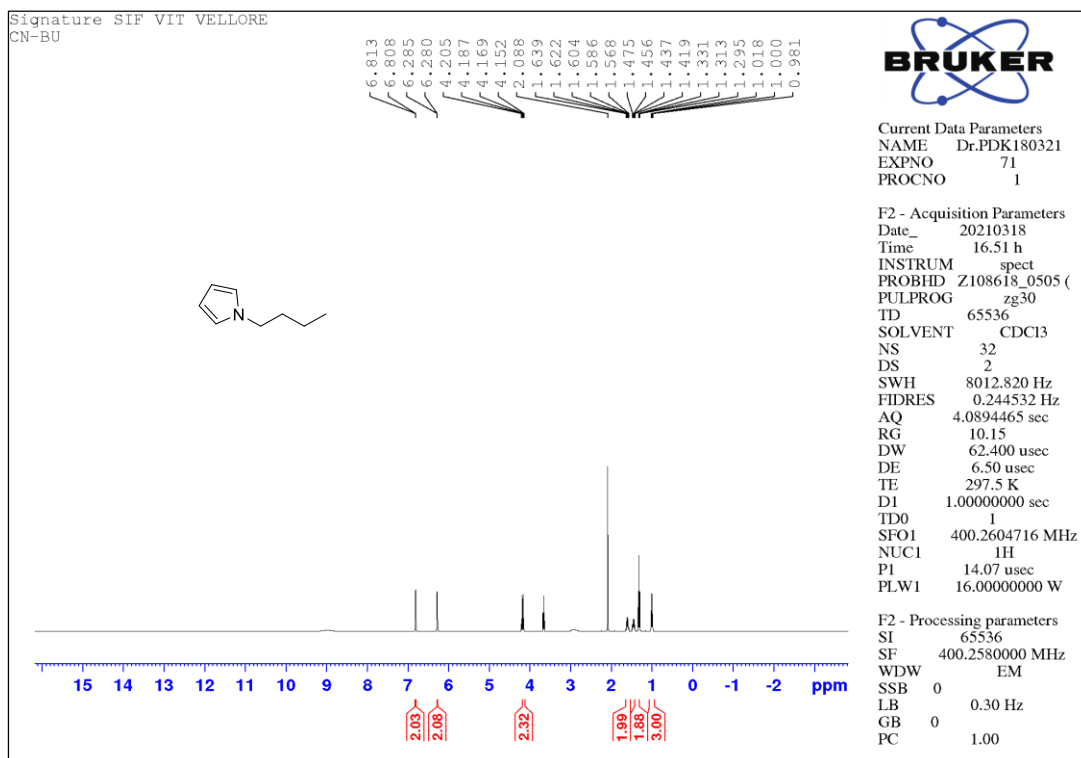

Fig. S48 <sup>1</sup>H NMR spectrum of 1-Butyl 1-H-pyrrole (D18)

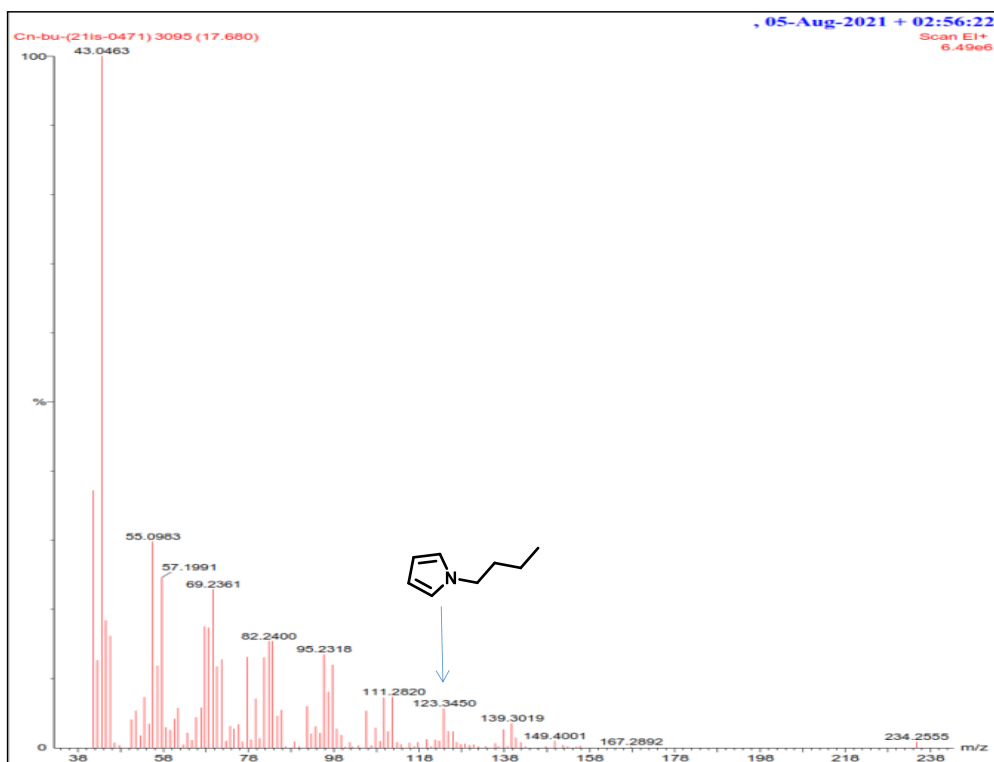

Fig. S49 GCMS spectrum of 1-Butyl 1-H-pyrrole (D18)

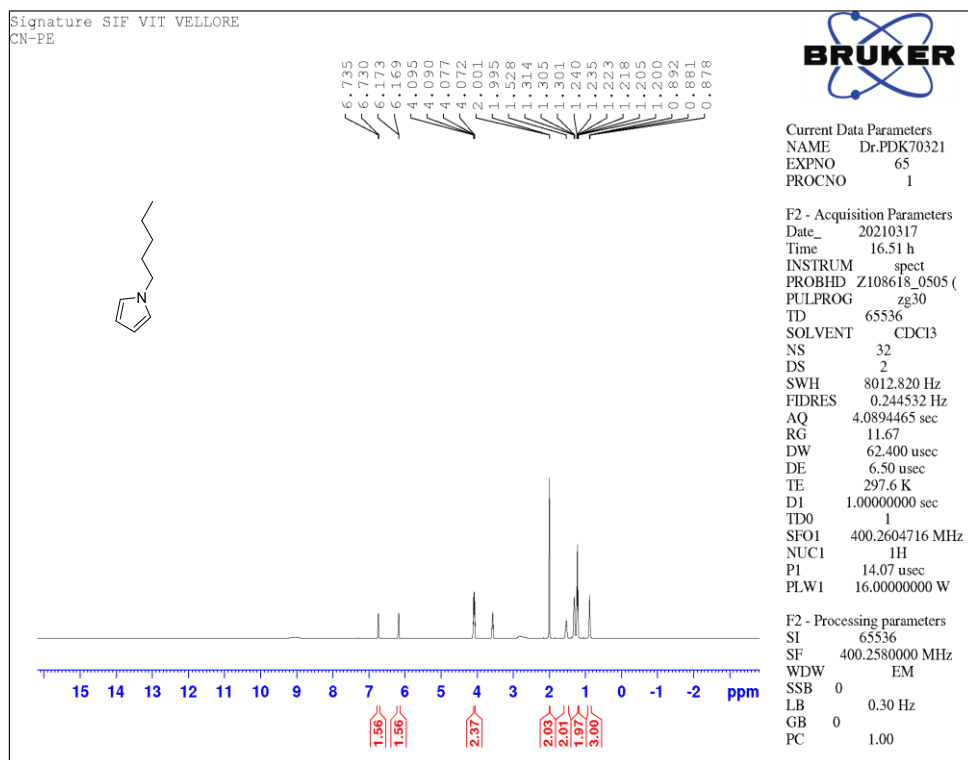

Fig.S50 <sup>1</sup>H NMR spectrum of 1-pentyl-1H-pyrrole (D19)

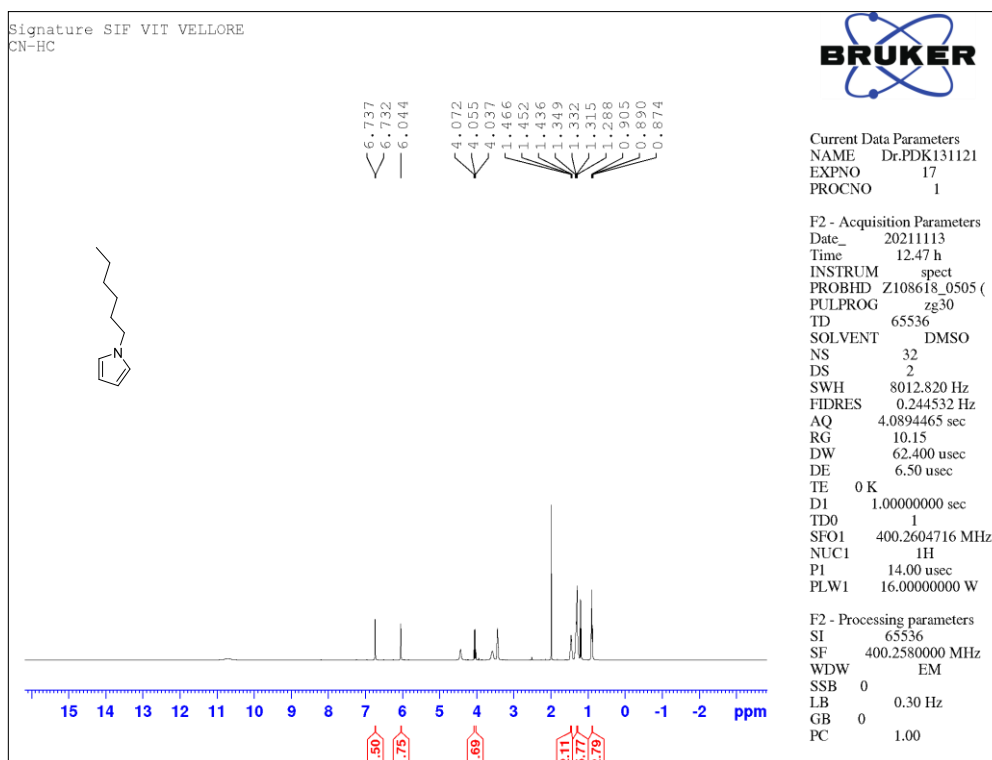

Fig.S51  $^1\text{H}$  NMR spectrum of 1-hexyl-1H-pyrrole (D20)

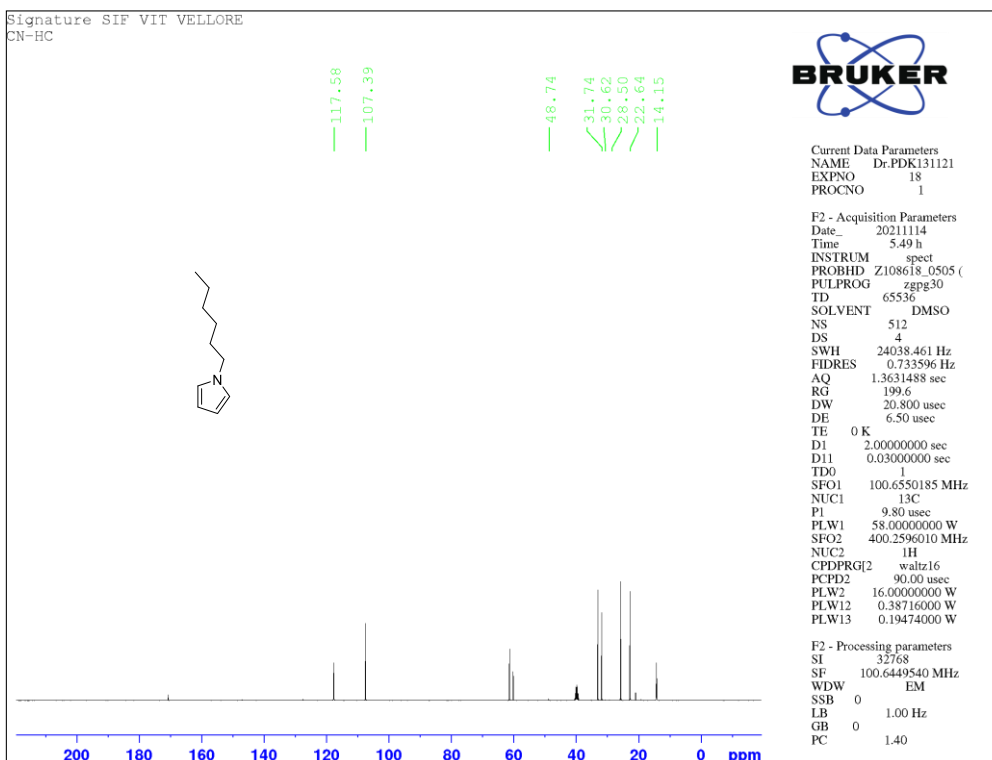

Fig.S52  $^{13}\text{C}$  NMR spectrum of 1-hexyl-1H-pyrrole (D20)

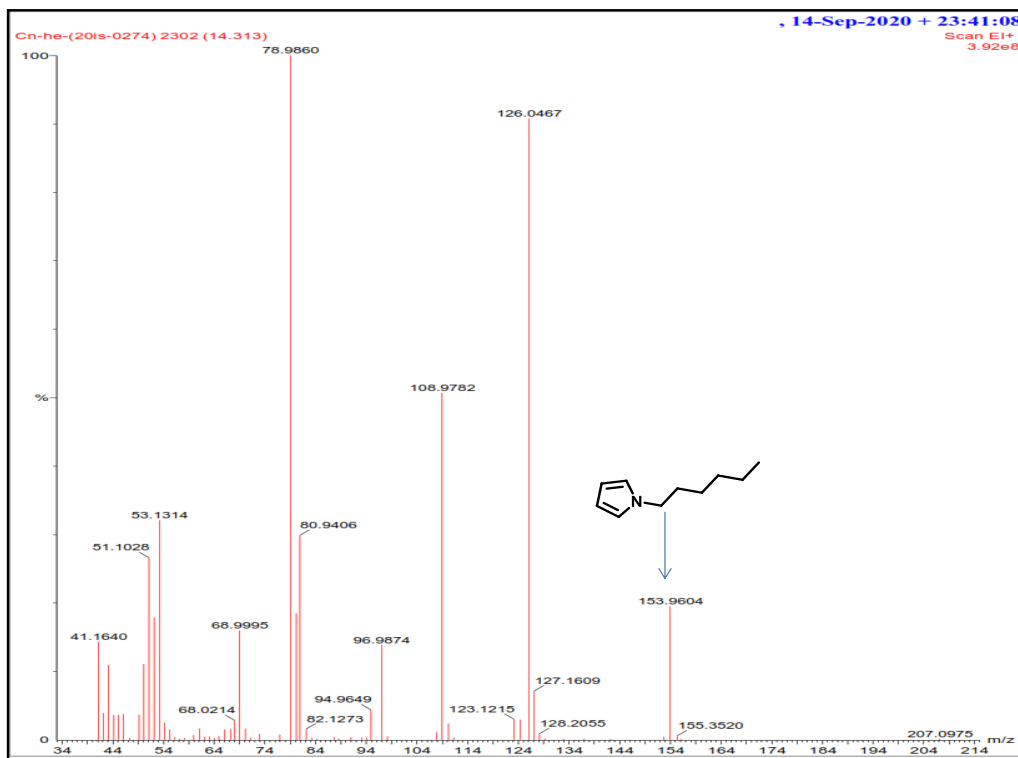

Fig.S53 <sup>13</sup>C GCMS spectrum of 1-hexyl-1H-pyrrole (D20)

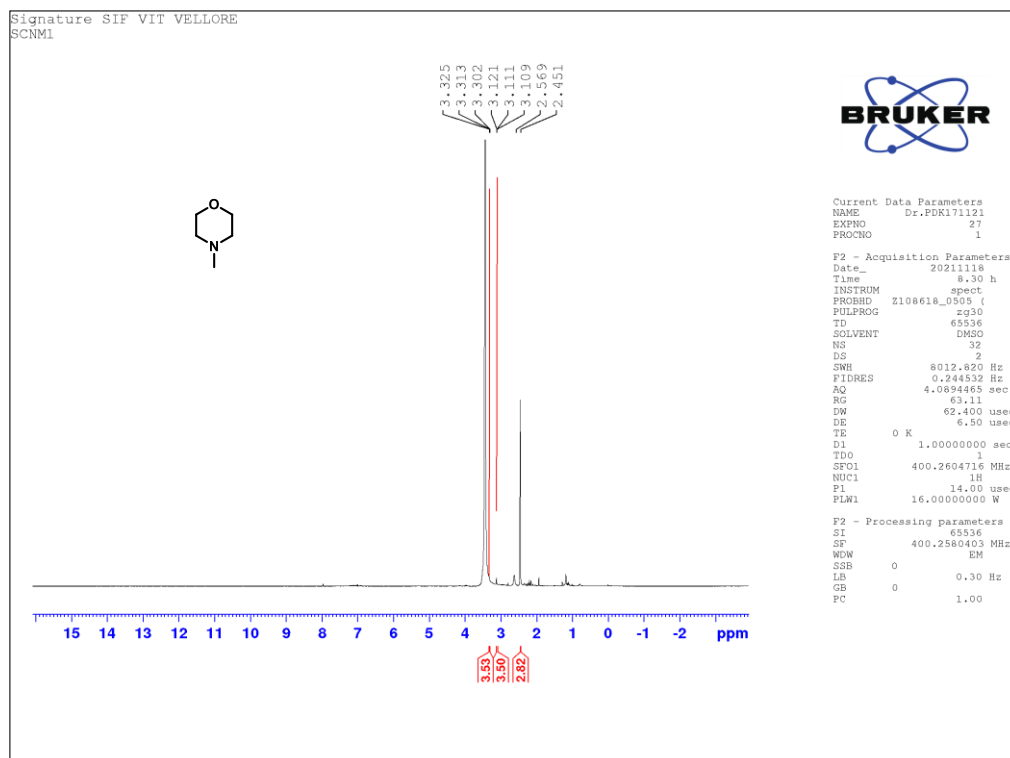

Fig.S54 <sup>1</sup>H NMR spectrum of 4-methylmorpholine (D21)

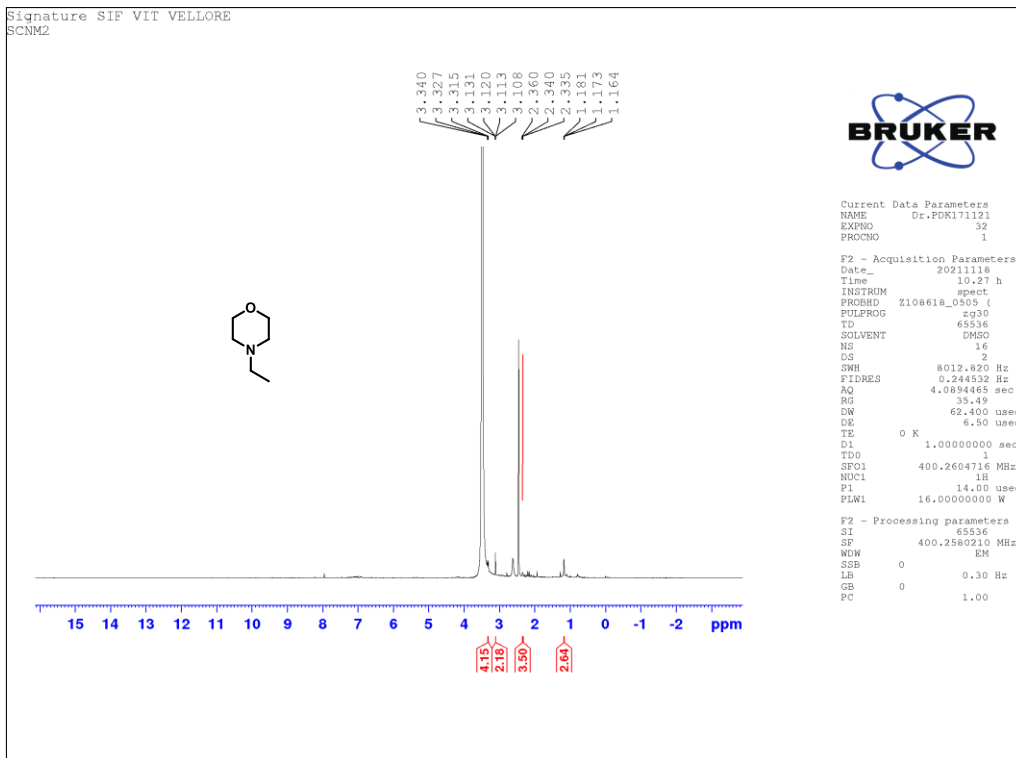

Fig.S55 <sup>1</sup>H NMR spectrum of 4-Ethyl morpholine (D22)

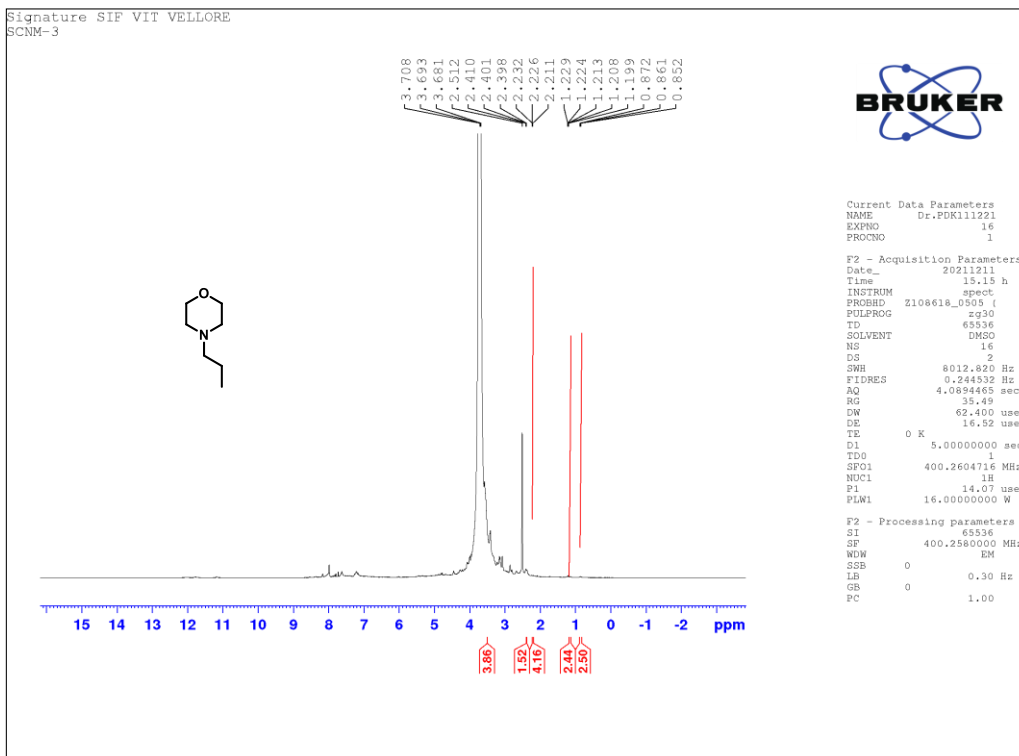

Fig.S56 <sup>1</sup>H NMR spectrum of 4-Propyl morpholine (D23)

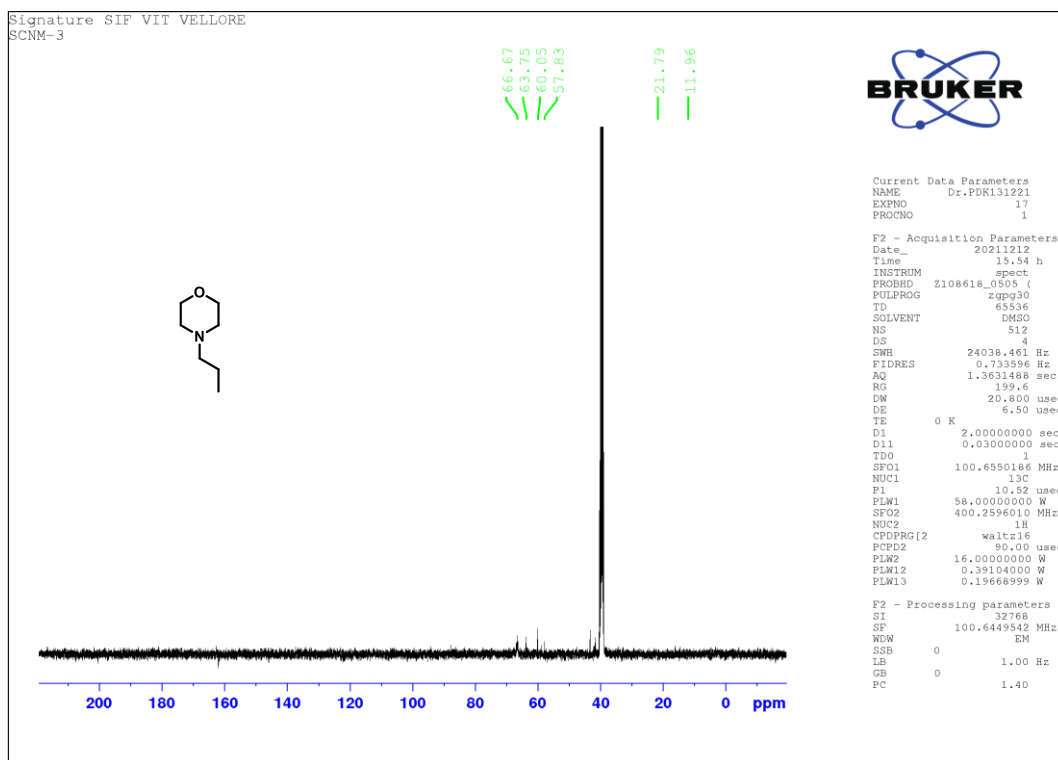

Fig.S57 <sup>13</sup>C NMR spectrum of 4-propylmorpholine (D23)

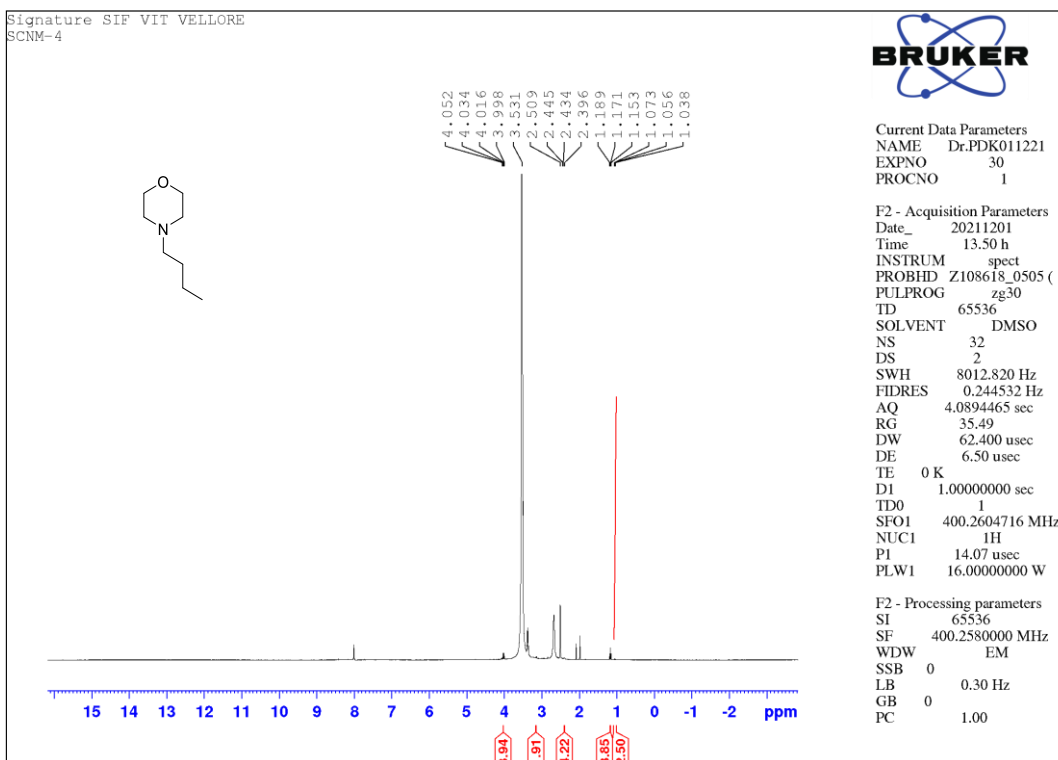

Fig. S58 <sup>1</sup>H NMR spectrum of 4-butylmorpholine (D24)



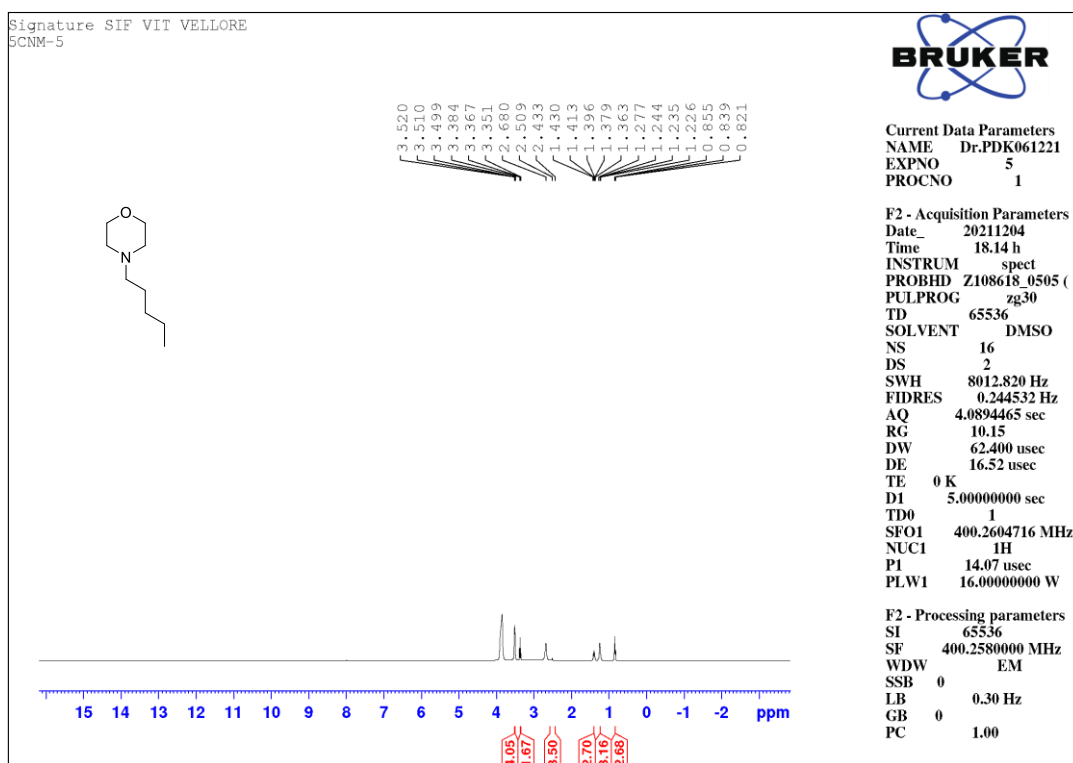

Fig. S59  $^1\text{H}$  NMR spectrum of 4-pentylmorpholine (D25)

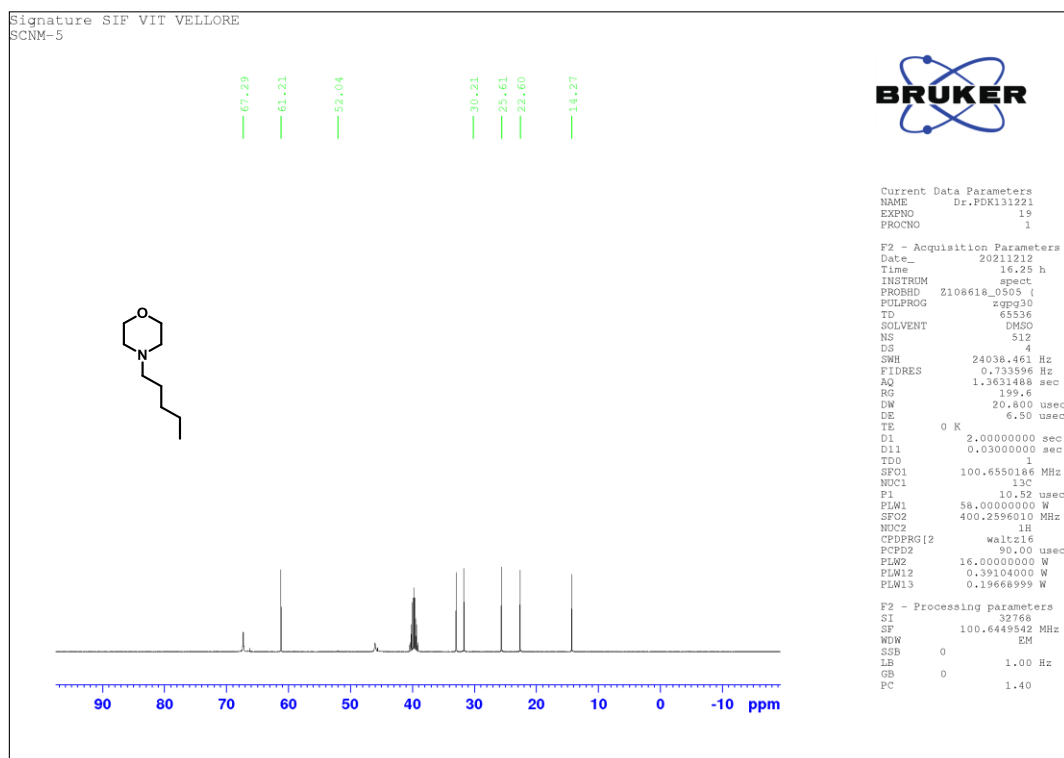

Fig. S60  $^{13}\text{C}$  NMR spectrum of 4-pentylmorpholine (D25)

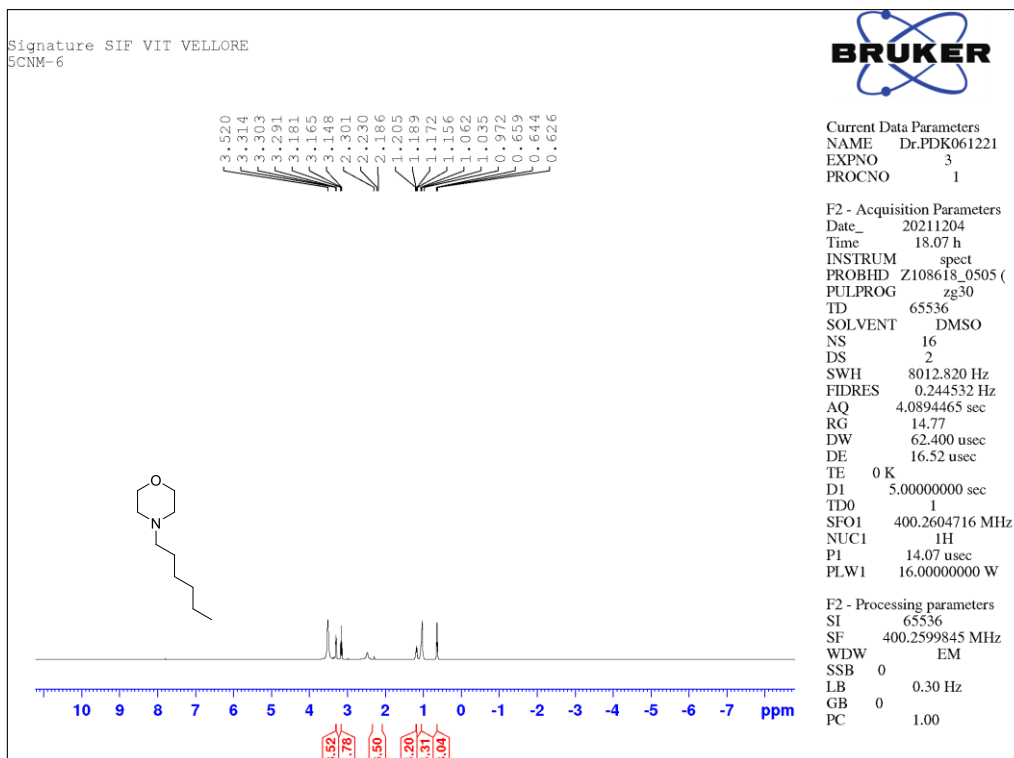

Fig. S61  $^1\text{H}$  NMR spectrum of 4-hexylmorpholine (D26)

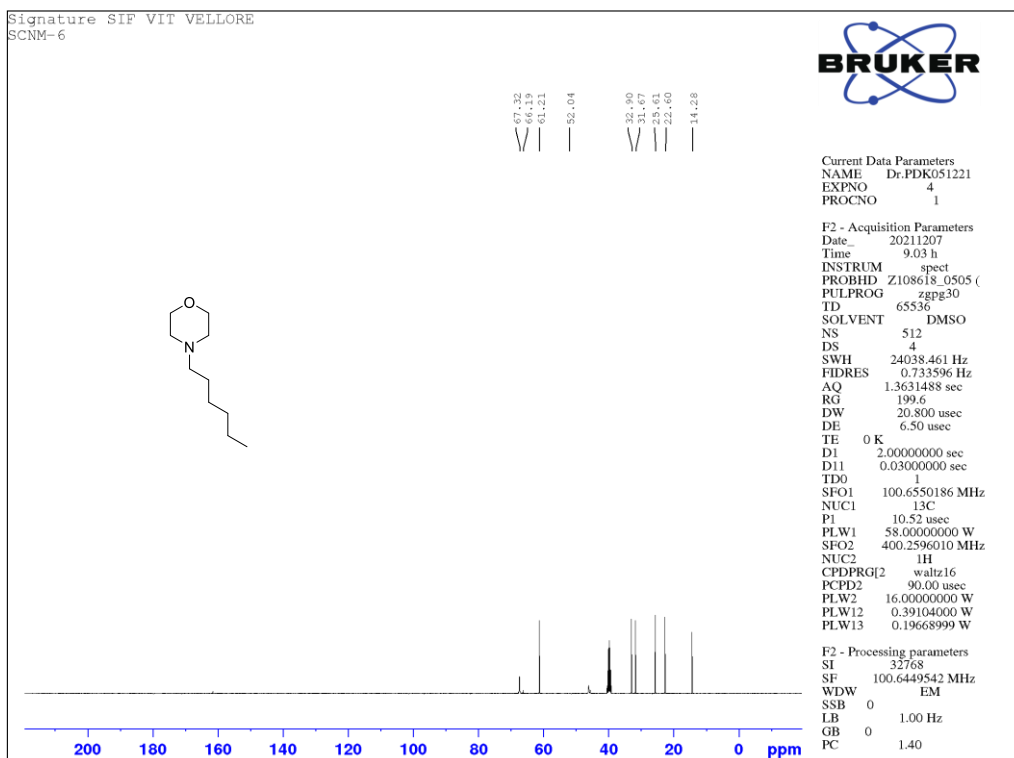

Fig. S62  $^{13}\text{C}$  NMR spectrum of 4-hexylmorpholine (D26)

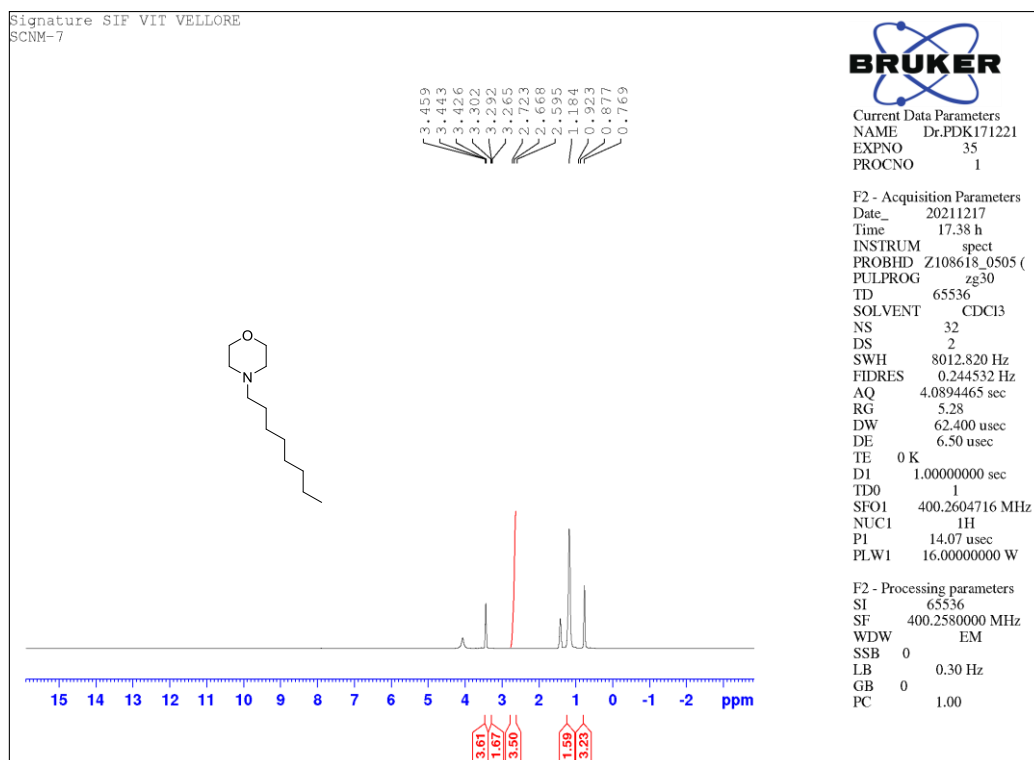

Fig. S63  $^1\text{H}$  NMR spectrum of 4-octylmorpholine (D27)

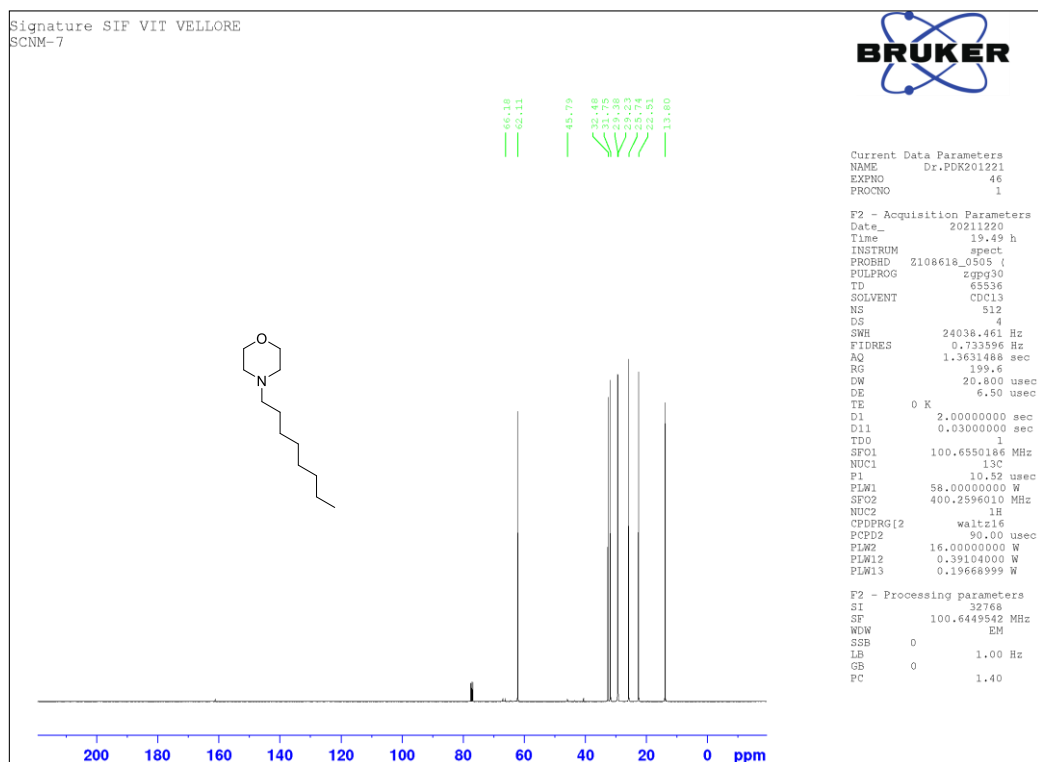

Fig. S64  $^{13}\text{C}$  NMR spectrum of 4-octylmorpholine (D27)

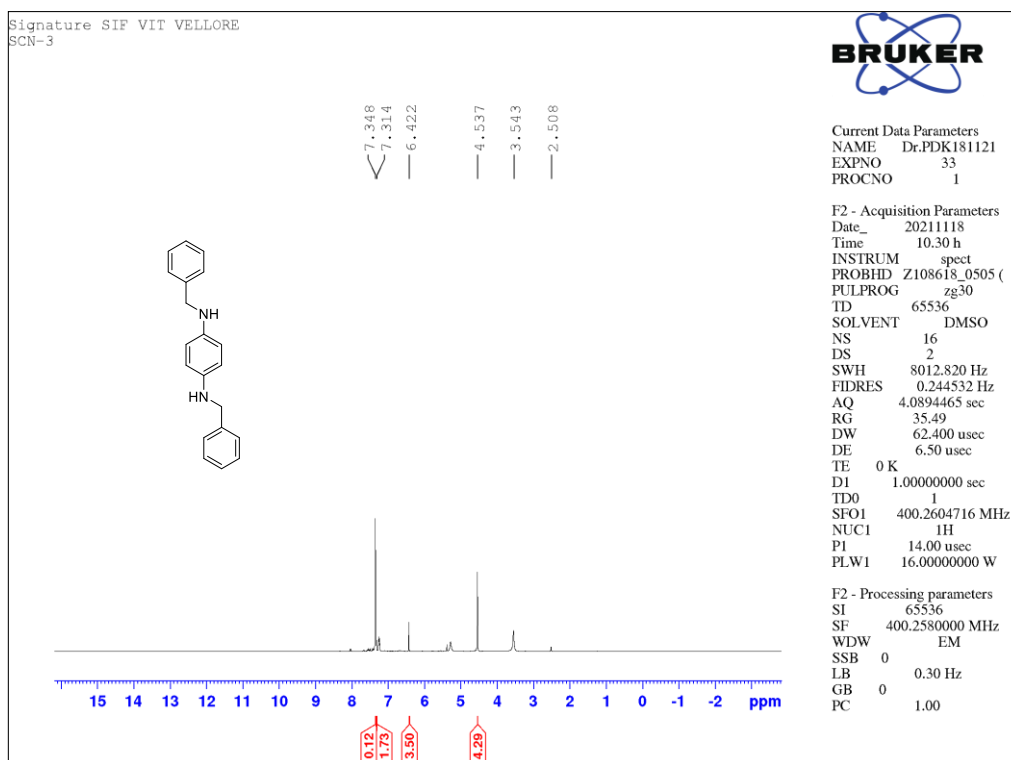

Fig. S65  $^1\text{H}$  NMR spectrum of  $\text{N}^1, \text{N}^4$ -dibenzylbenzene-1,4-diamine (D28)

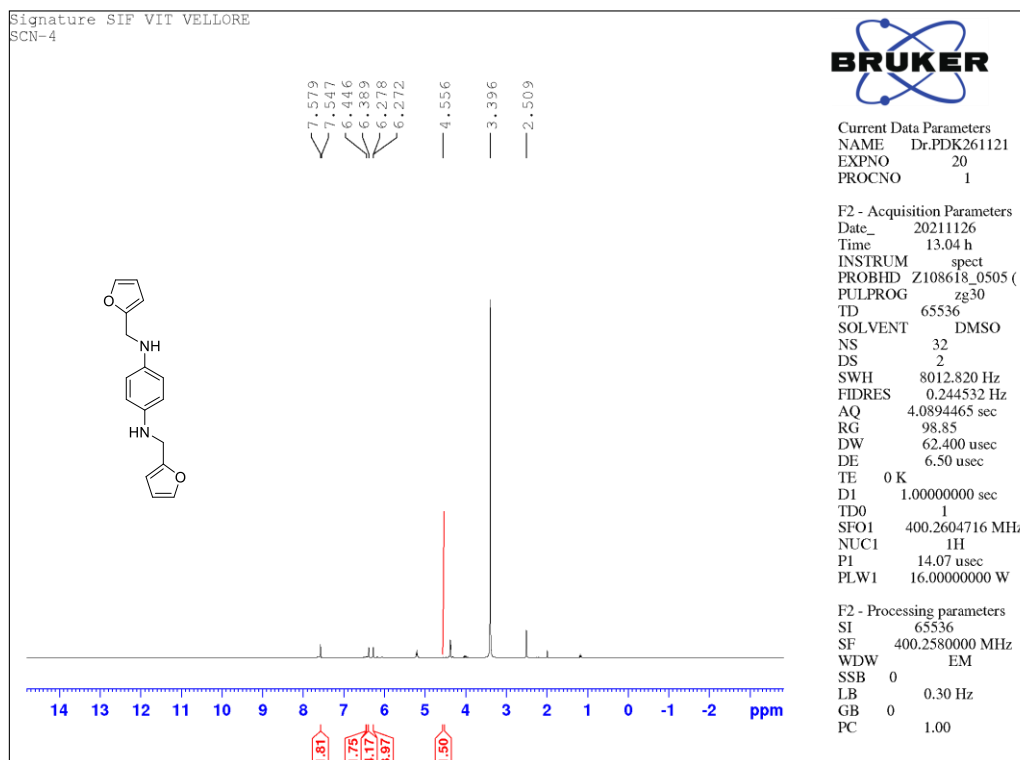

Fig. S66  $^1\text{H}$  NMR spectrum of  $\text{N}^1, \text{N}^4$ -bis(furan-2-ylmethyl)benzene-1,4-diamine (D29)

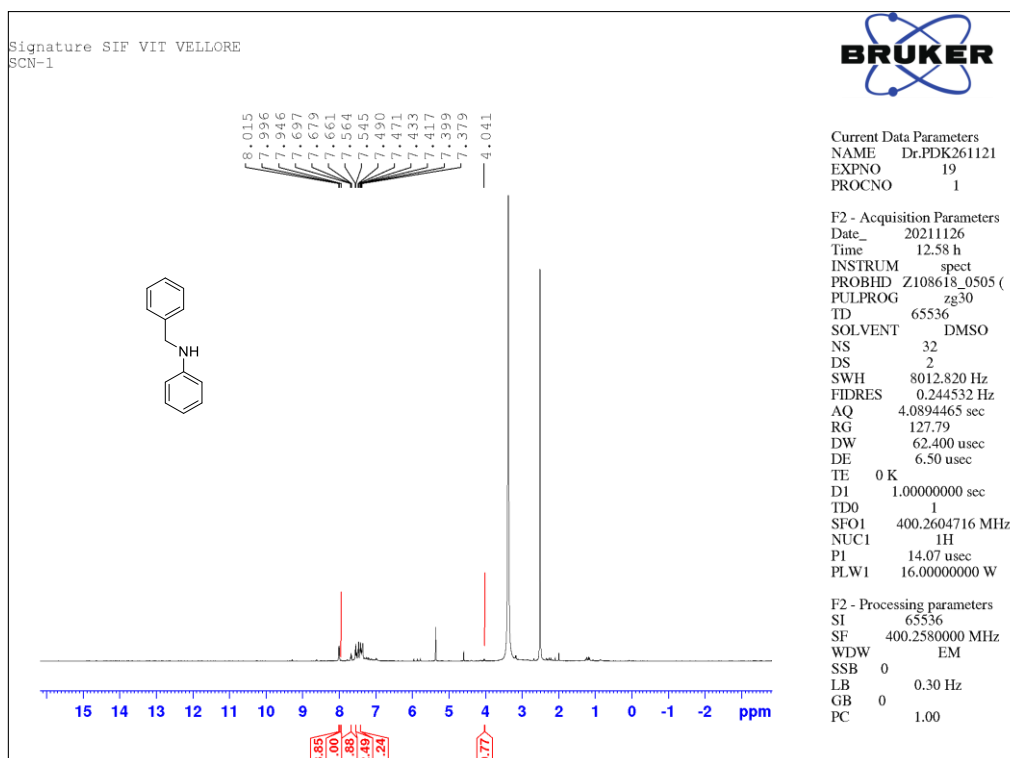

Fig. S67  $^1\text{H}$  NMR spectrum of N-benzylaniline (D30)

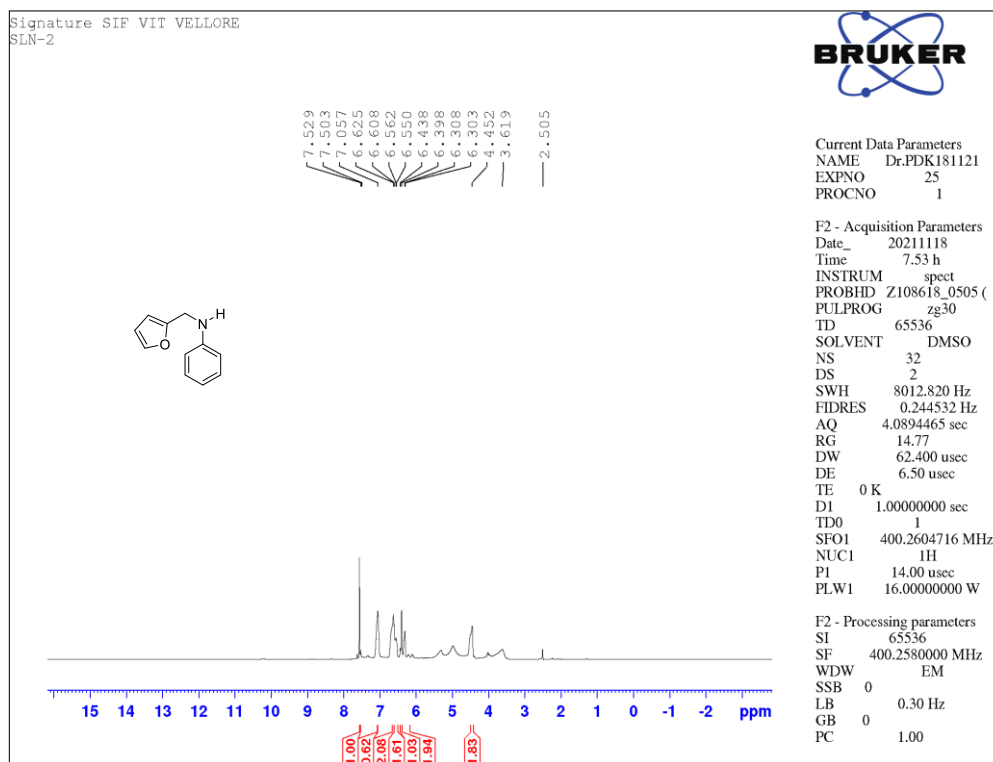

Fig. S68  $^1\text{H}$  NMR spectrum of N-(furan-2-ylmethyl) aniline (D31)

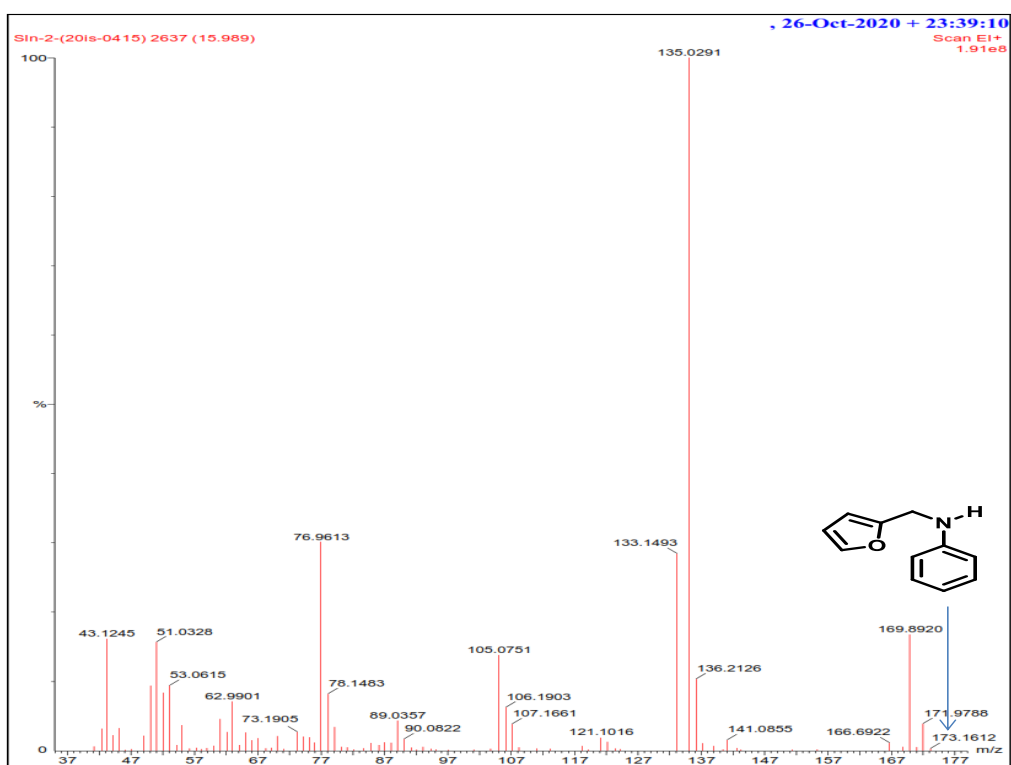

Fig. S69 <sup>1</sup>GCMS spectrum of N-(furan-2-ylmethyl) aniline (D31)

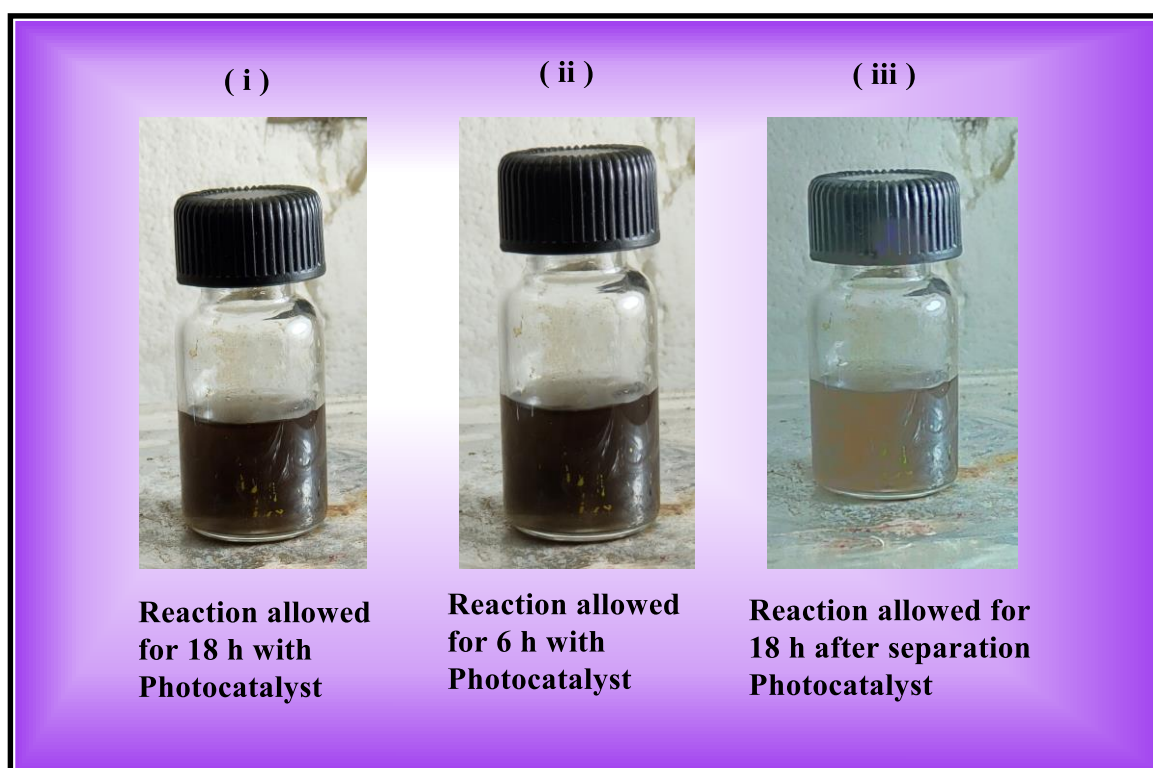

Fig. S70 Leaching test of photocatalyst under optimized conditions

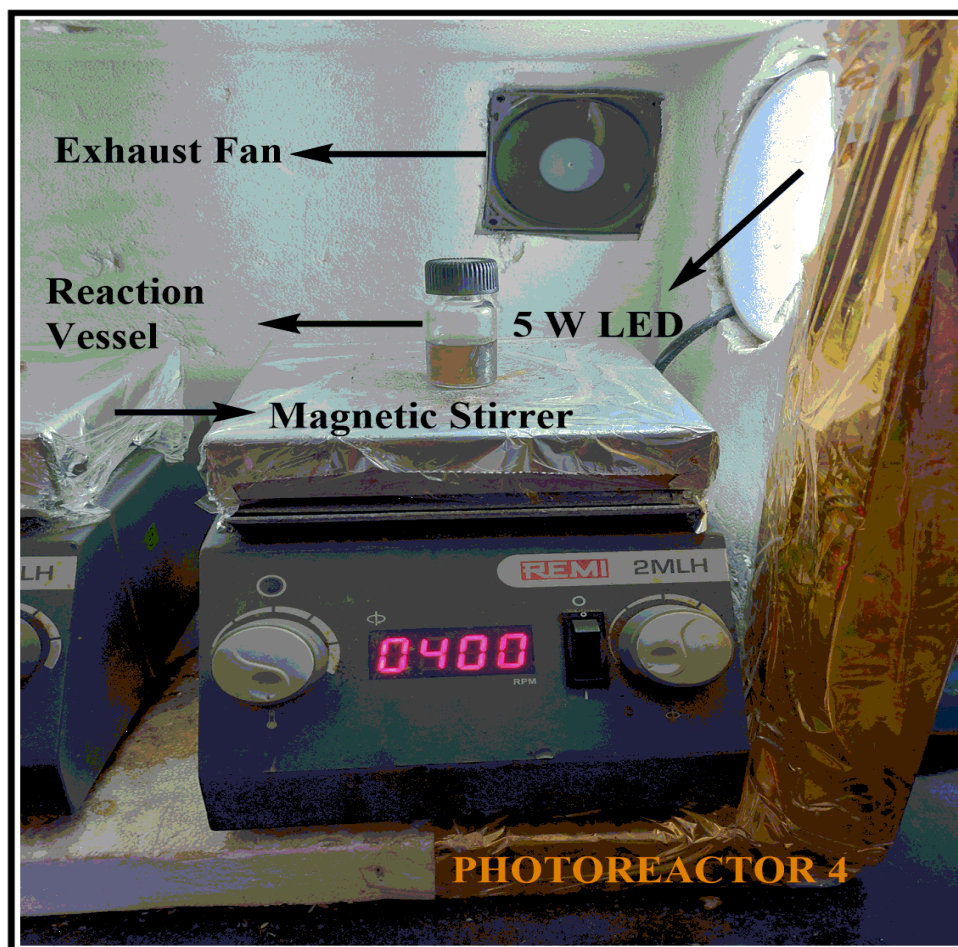

Fig. S71 Home-made Photocatalytic Reactor

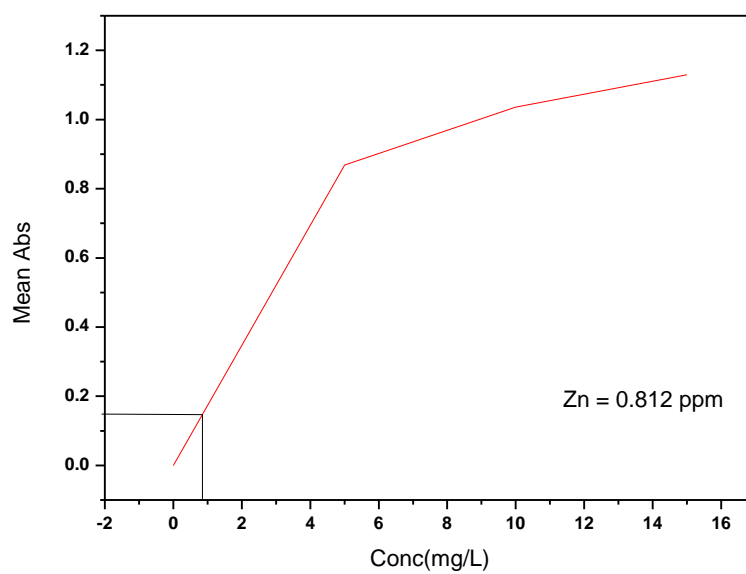

Fig. S72. Atomic absorption spectroscopy of Zn

Table S1. Comparison of binding energies of different metals in XPS

| Sr.no | Porphyrin based catalyst                                 | Range of binding energies in XPS                                                           | References                                                                                                                                                                                                                                                                                                                                   |
|-------|----------------------------------------------------------|--------------------------------------------------------------------------------------------|----------------------------------------------------------------------------------------------------------------------------------------------------------------------------------------------------------------------------------------------------------------------------------------------------------------------------------------------|
| 1.    | Zn-TESP                                                  | Zn 2p <sub>3/2</sub> B.E range 1020-1025 eV                                                | Killian, M. S., Gnichwitz, J. F., Hirsch, A., Schmuki, P., & Kunze, J. (2010). ToF-SIMS and XPS studies of the adsorption characteristics of a Zn-porphyrin on TiO <sub>2</sub> . <i>Langmuir</i> , 26(5), 3531-3538.                                                                                                                        |
| 2.    | Platinum complex/Zn-porphyrin                            | Pt 4f <sub>7/2</sub> B.E range 70-73 eV                                                    | Polzonetti, G., Ferri, A., Russo, M. V., Iucci, G., Licoccia, S., & Paolesse, R. (1999). Platinum complex/Zn-porphyrin macrosystem assemblies: Electronic structure and conformational investigation by x-ray photoelectron spectroscopy. <i>Journal of Vacuum Science &amp; Technology A: Vacuum, Surfaces, and Films</i> , 17(3), 832-839. |
| 3.    | Porphyrin-based porous polyimide polymer/Pd nanoparticle | Pd 3d <sub>5/2</sub> B.E range 335-345 eV                                                  | Zhu, W., Wang, X., Li, T., Shen, R., Hao, S. J., Li, Y., ... & Gu, Z. G. (2018). Porphyrin-based porous polyimide polymer/Pd nanoparticle composites as efficient catalysts for Suzuki–Miyaura coupling reactions. <i>Polymer Chemistry</i> , 9(12), 1430-1438.                                                                              |
| 4.    | Fe (III) Porphyrin surface anchored TiO <sub>2</sub>     | Fe 2p <sub>3/2</sub> B.E 710 eV                                                            | ArunaKumari, M. L., & Devi, L. G. (2015). New insights into the origin of the visible light photocatalytic activity of Fe (III) porphyrin surface anchored TiO <sub>2</sub> . <i>Environmental Science: Water Research &amp; Technology</i> , 1(2), 177-187.                                                                                 |
| 5.    | MFBBCFPc                                                 | No evidence of metal B.E with respect to Zn/ Pt/ Pd/ Fe observed in MFBBCFPc photocatalyst | Present work (Fig.6 (a) XPS survey of MFBBCFPc, (b) High resolution of O1s of MFBBCFPc, (c) High resolution of N1s of MFBBCFPc, (d) High resolution of C1s of MFBBCFPc, (e) High resolution of Br3d of MFBBCFPc)                                                                                                                             |

Table S2. Elemental ID and Quantification obtained from XPS data

| Name     | Peak BE | FWHM eV | Area (P) CPS.eV | Atomic % | Q |
|----------|---------|---------|-----------------|----------|---|
| C1s      | 285.53  | 1.75    | 895404.71       | 67.88    | 1 |
| O1s      | 532.95  | 3.27    | 318090.56       | 9.98     | 1 |
| N1s      | 400.95  | 3.49    | 171619.32       | 8.39     | 1 |
| Br3d     | 68.83   | 2.97    | 43531.69        | 1.06     | 1 |
| Si2p ??? | 102.96  | 4.01    | 11327.96        | 0.86     | 1 |
| S2p ???  | 169.59  | 2.00    | 10906.55        | 0.41     | 1 |
| Br3d     | 67.91   | 2.02    | 5675.21         | 0.14     | 1 |
| C1s      | 284.87  | 1.73    | 116234.76       | 8.81     | 1 |
| N1s      | 400.44  | 2.99    | 22530.84        | 1.10     | 1 |
| O1s      | 532.49  | 2.72    | 43977.98        | 1.38     | 1 |



Table S3. Atomic absorption spectroscopy of Zn

| Sample ID | Conc mg/L | Mean Abs |
|-----------|-----------|----------|
| Std 1     | 5         | 0.8688   |
| Std 2     | 10        | 1.0359   |
| Std 3     | 15        | 1.294    |
| SR-158    | X         | 0.1461   |

X = 0.812 mg/L

Table S4. ICP-OES of CN-35 and MFBBCFPC

| <b>SOPHISTICATED ANALYTICAL INSTRUMENT FACILITY<br/>                     IIT MADRAS, CHENNAI-36<br/>                     PERKIN ELMER OPTIMA 5300 DV ICP-OES</b> |                                    |                                             |
|------------------------------------------------------------------------------------------------------------------------------------------------------------------|------------------------------------|---------------------------------------------|
| Sample code                                                                                                                                                      | Element symbol and Wavelength (nm) | Concn.in ppm $\mu\text{g/ml}$ (or) mg/litre |
| CN-35                                                                                                                                                            | Fe 238.204                         | 0.070 mg/L                                  |
|                                                                                                                                                                  | Pd 340.458                         | BDL                                         |
|                                                                                                                                                                  | Ru 240.272                         | 0.002 mg/L                                  |
|                                                                                                                                                                  | Zn 206.200                         | 0.020 mg/L                                  |
| MFBBCFPC                                                                                                                                                         | Fe 238.204                         | 0.912 mg/L                                  |
|                                                                                                                                                                  | Pd 340.458                         | BDL                                         |
|                                                                                                                                                                  | Ru 240.272                         | 0.013 mg/L                                  |
|                                                                                                                                                                  | Zn 206.200                         | 0.678 mg/L                                  |
